# Supplementary material for: An expedient, efficient and solvent-free synthesis of T3P®-mediated amidation of benzhydrols with poorly reactive N-nucleophiles under MW irradiation
Source: Royal Society of Chemistry journal article supplement (doi:10.1039/d1nj04502d), 2022-01-01
Supplement: d1nj04502d1.pdf [file d1nj04502d1.pdf]

## Supporting Information

### **An Expedient, Efficient and Solvent-Free Synthesis of T3P®-Mediated Amidation of Benzhydrols with Poorly Reactive *N*-Nucleophiles Under MW Irradiation.**

**Srinivas Cheruku<sup>a</sup>, Sandhya C Nagarakere<sup>c</sup>, Makanahalli P Sunilkumar<sup>b</sup>, Yatheesh Narayana<sup>b</sup>, Kumara N Manikyanally<sup>\*a</sup>, Kanchugarakoppal S Rangappa<sup>d</sup> & Kempegowda Mantelingu<sup>\*b</sup>**

---

**a. Department of Studies in Chemistry, Yuvaraja's College, University of Mysore, Mysuru, Karnataka, India; E-mail: kumaramanikya@yahoo.com,**

**b. Department of Studies in Chemistry, Manasagangotri, University of Mysore, Mysuru-570006, Karnataka, E-mail: kmlingu@gmail.com,**

**c. Department of Chemistry, St. Philomena's College, Mysuru, India.**

***N*-benzhydrylbenzamide (3a):**

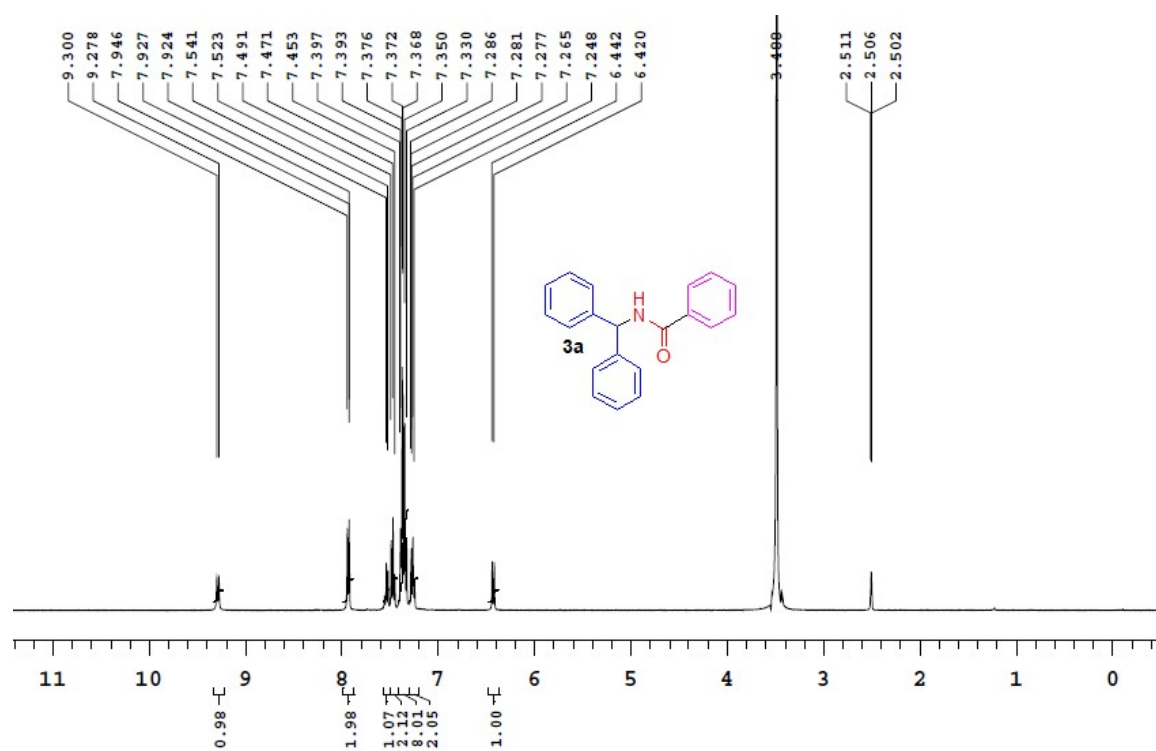

**Figure 1.** <sup>1</sup>H NMR of *N*-benzhydrylbenzamide

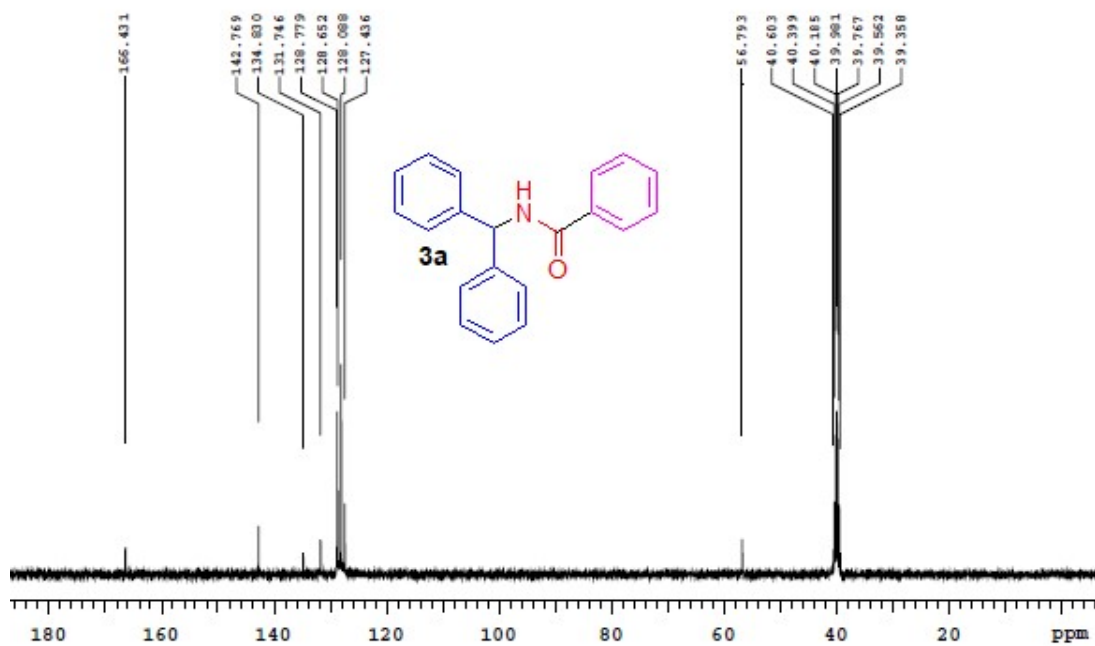

Figure 2.  $^{13}\text{C}$  NMR of *N*-benzhydrylbenzamide

*N*-benzhydryl-4-fluorobenzamide (**3b**):

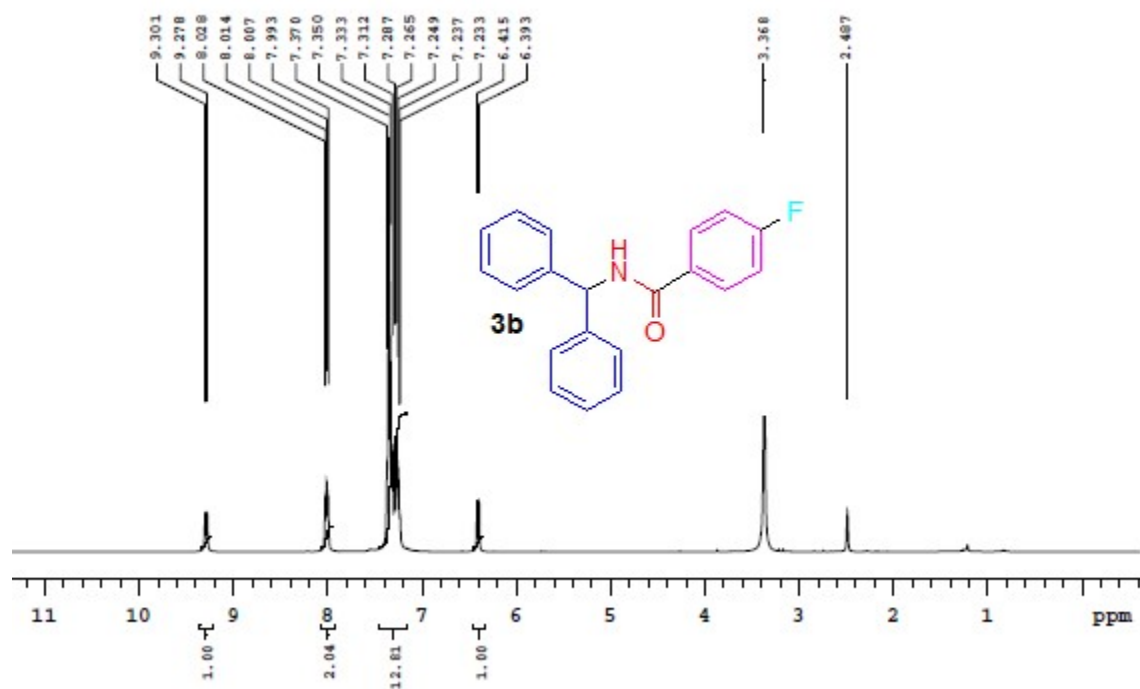

Figure 3.  $^1\text{H}$  NMR of *N*-benzhydryl-4-fluorobenzamide

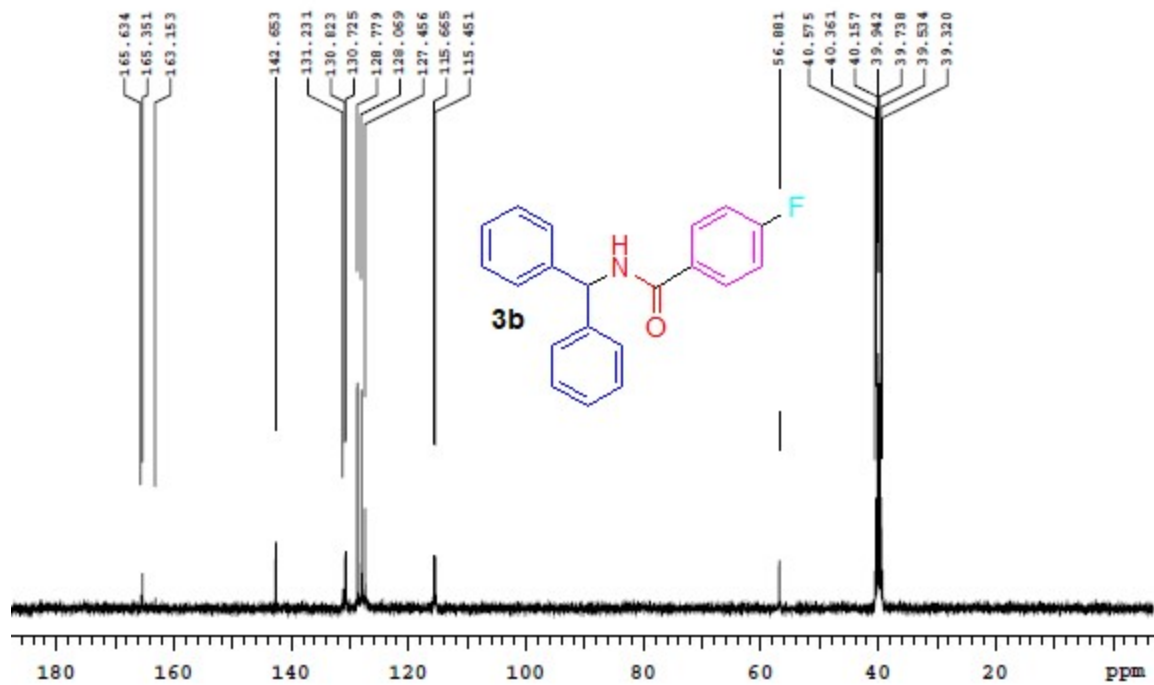

Figure 4.  $^{13}\text{C}$  NMR of *N*-benzhydryl-4-fluorobenzamide

*N*-benzhydryl-3-methoxybenzamide (**3c**):

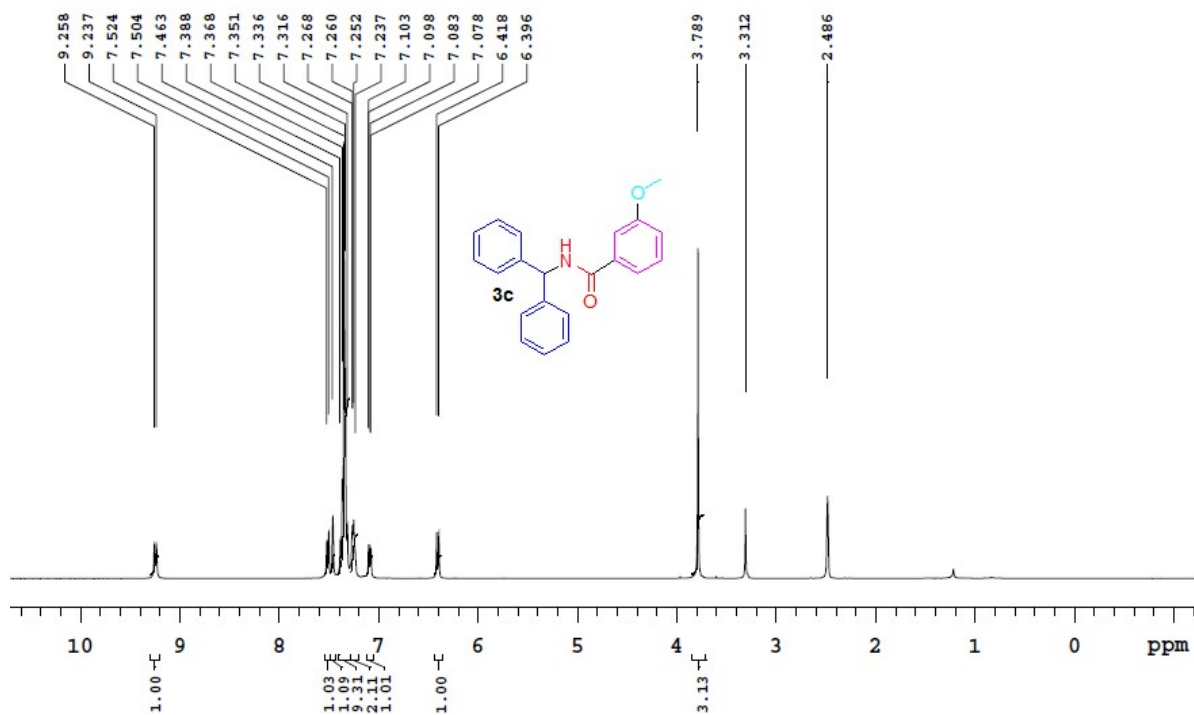

Figure 5.  $^1\text{H}$  NMR of *N*-benzhydryl-3-methoxybenzamide

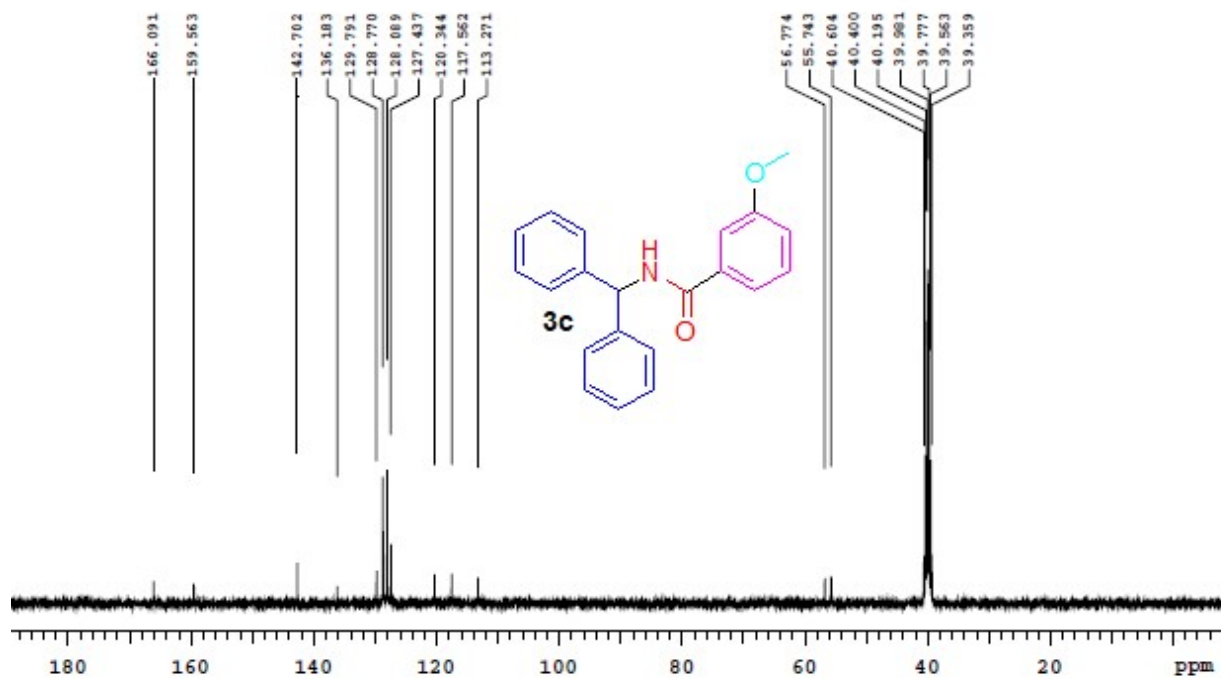

**Figure 6.**  $^{13}\text{C}$  NMR of *N*-benzhydryl-3-methoxybenzamide

*N*-benzhydryl-2-phenylacetamide (**3d**):

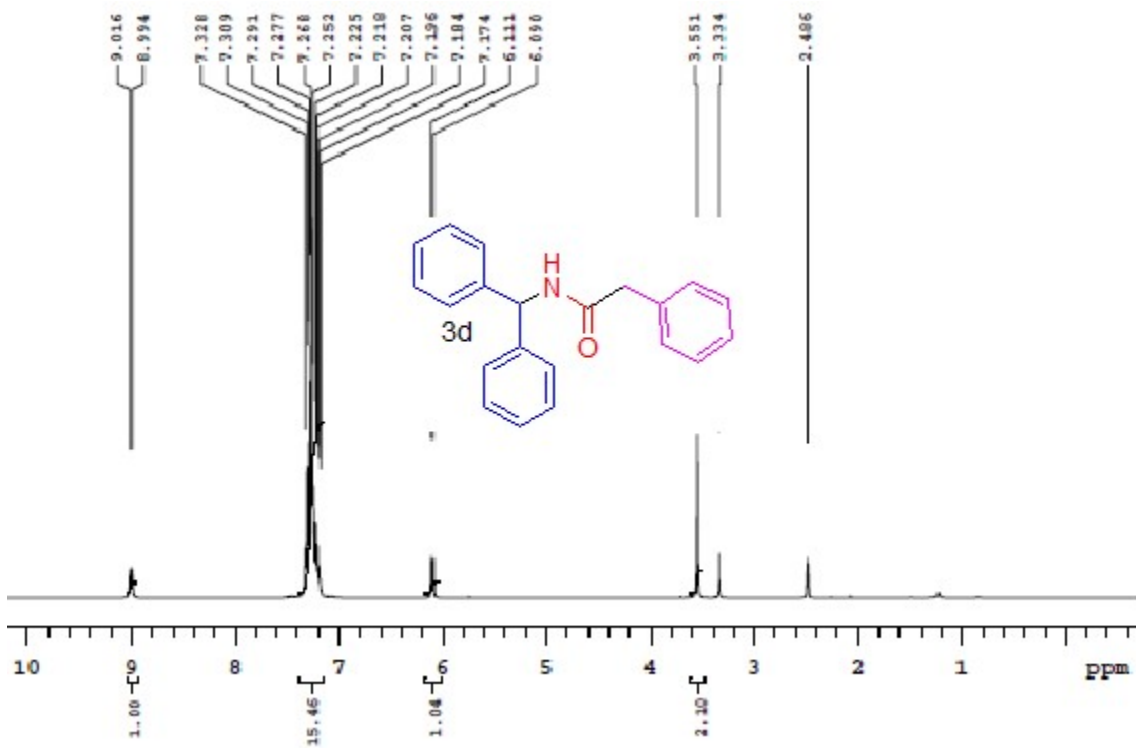

**Figure 7.**  $^1\text{H}$  NMR of *N*-benzhydryl-2-phenylacetamide

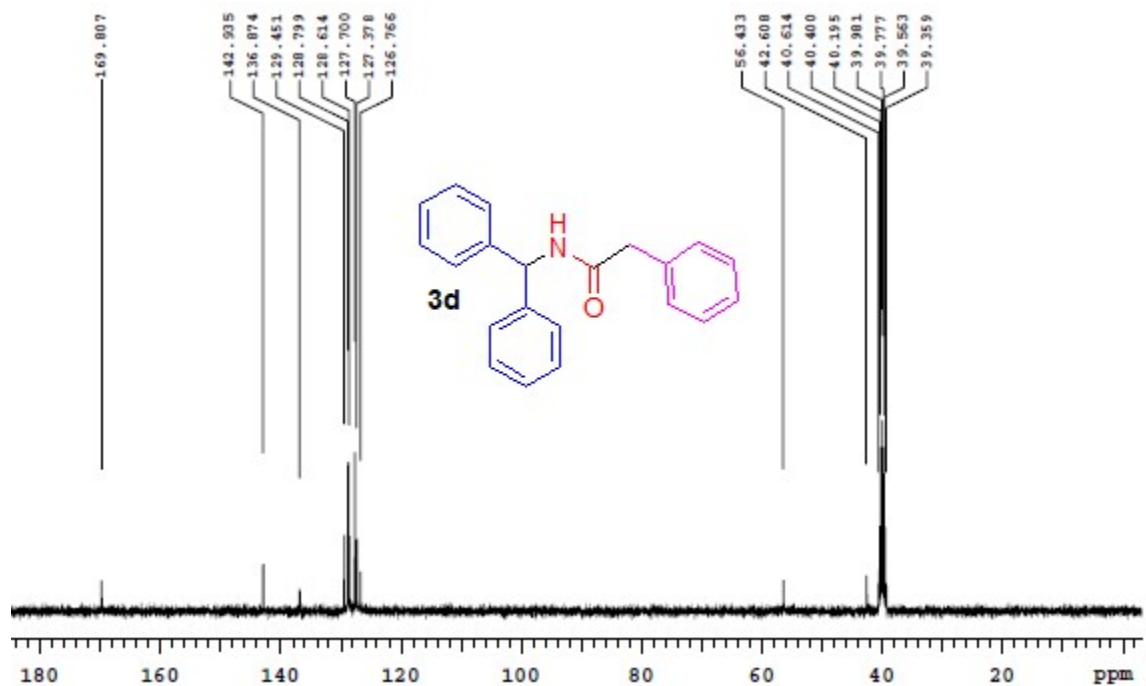

**Figure 8.**  $^{13}\text{C}$  NMR of *N*-benzhydryl-2-phenylacetamide

*N*-benzhydrylbenzo[d]thiazole-5-carboxamide (**3e**):

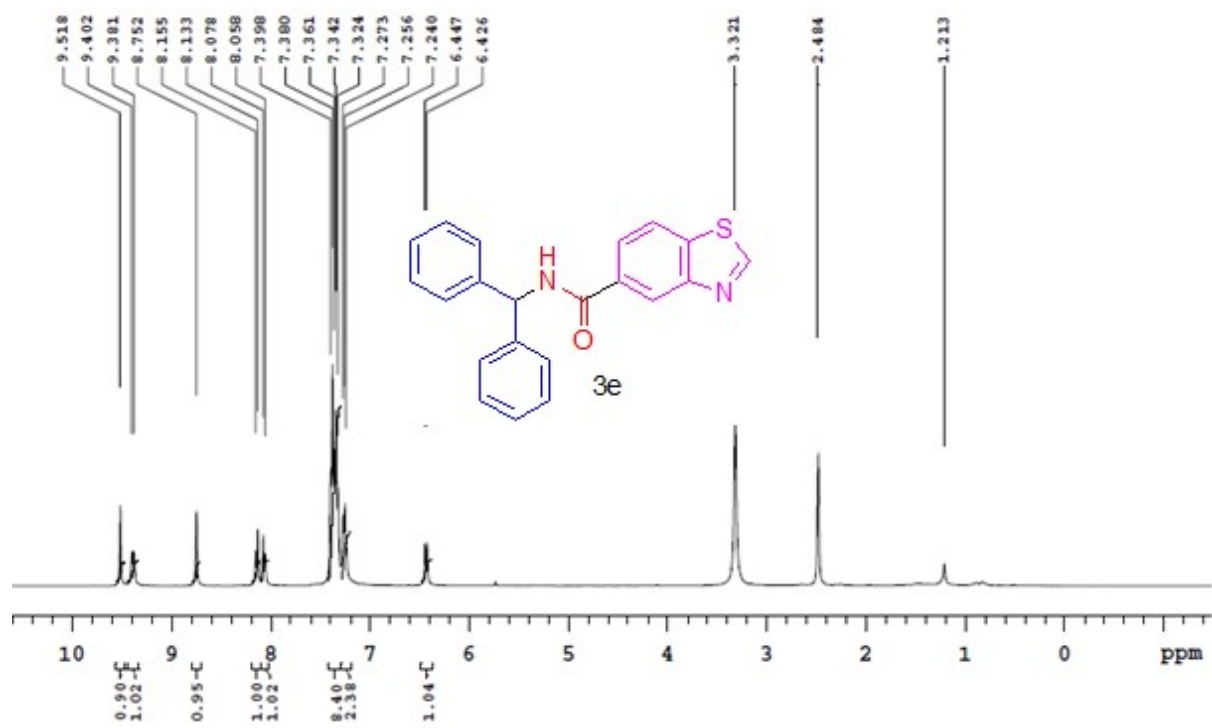

**Figure 9.**  $^1\text{H}$  NMR of *N*-benzhydrylbenzo[d]thiazole-5-carboxamide

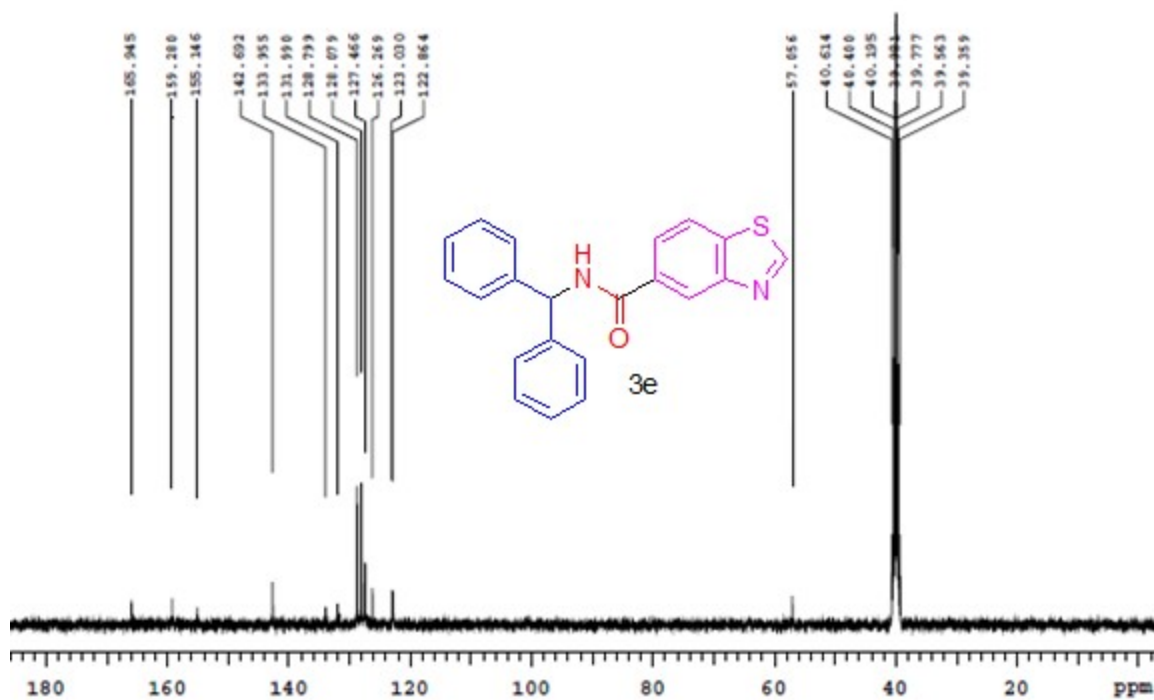

Figure 10. <sup>13</sup>C NMR of *N*-benzhydrylbenzo[d]thiazole-5-carboxamide

*N*-benzhydrylfuran-2-carboxamide (**3f**):

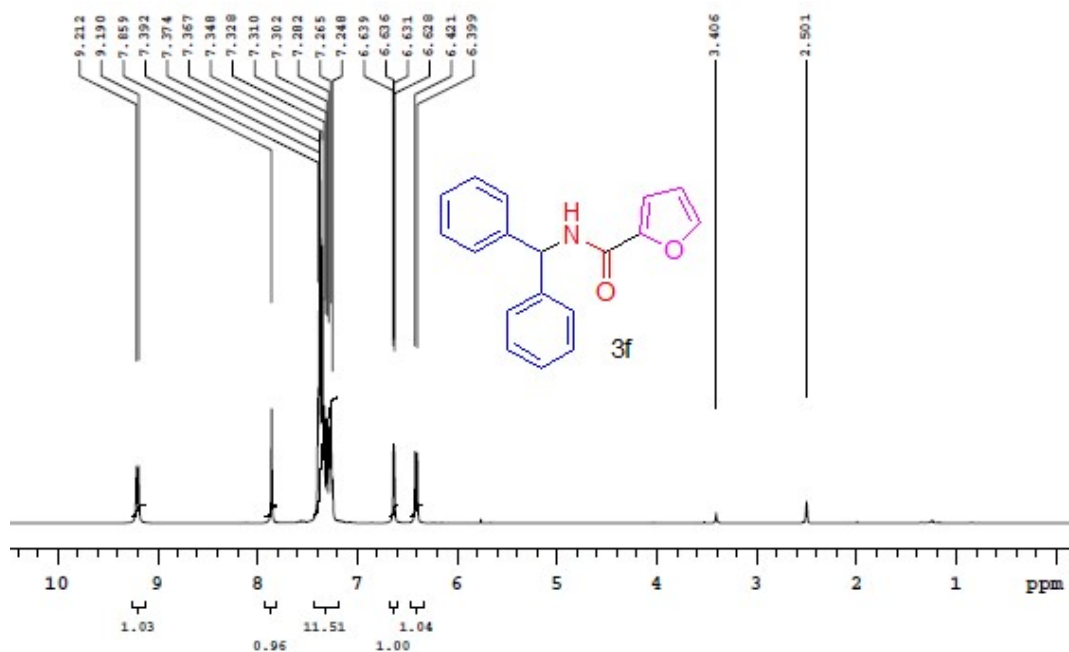

Figure 11. <sup>1</sup>H NMR of *N*-benzhydrylfuran-2-carboxamide

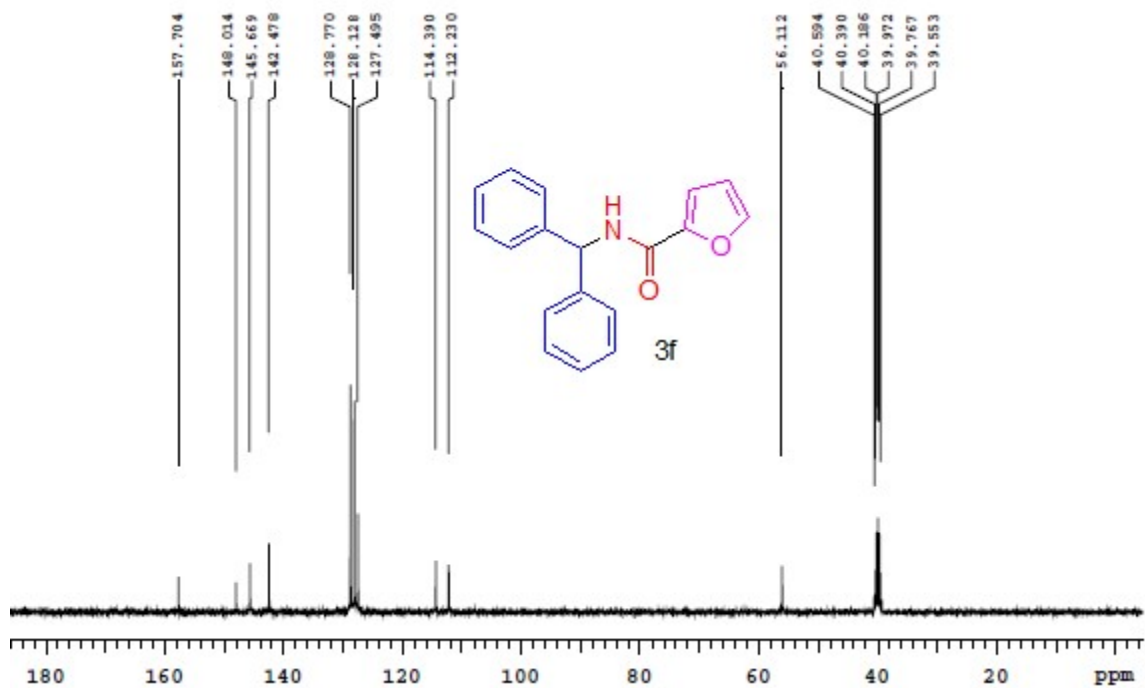

Figure 12. <sup>13</sup>C NMR of *N*-benzhydrylfuran-2-carboxamide

*N*-benzhydrylcyclohexanecarboxamide (3g):

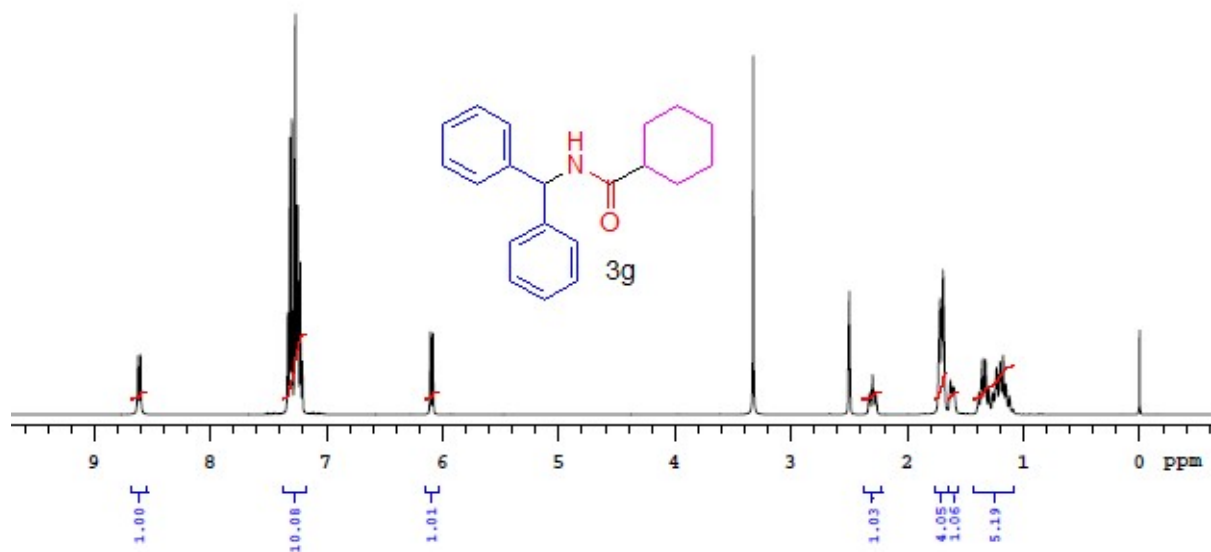

Figure 13. <sup>1</sup>H NMR of *N*-benzhydrylcyclohexanecarboxamide



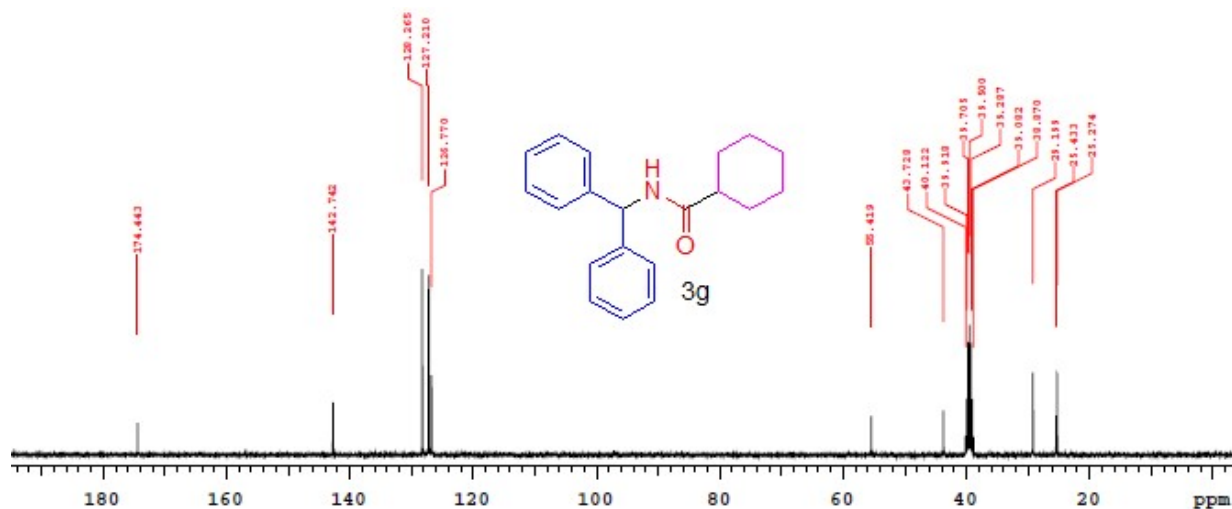

**Figure 14.** <sup>13</sup>C NMR of *N*-benzhydrylcyclohexanecarboxamide

*N*-(bis(4-chlorophenyl)methyl)benzamide (**3h**):

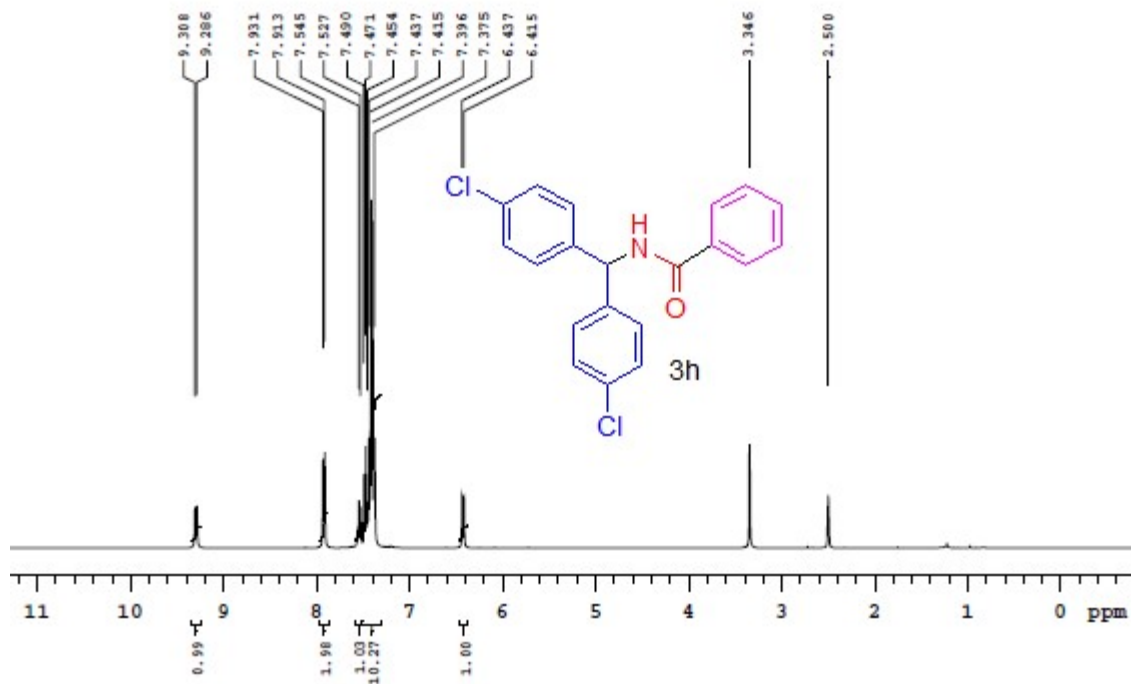

**Figure 15.** <sup>1</sup>H NMR of *N*-(bis(4-chlorophenyl)methyl)benzamide

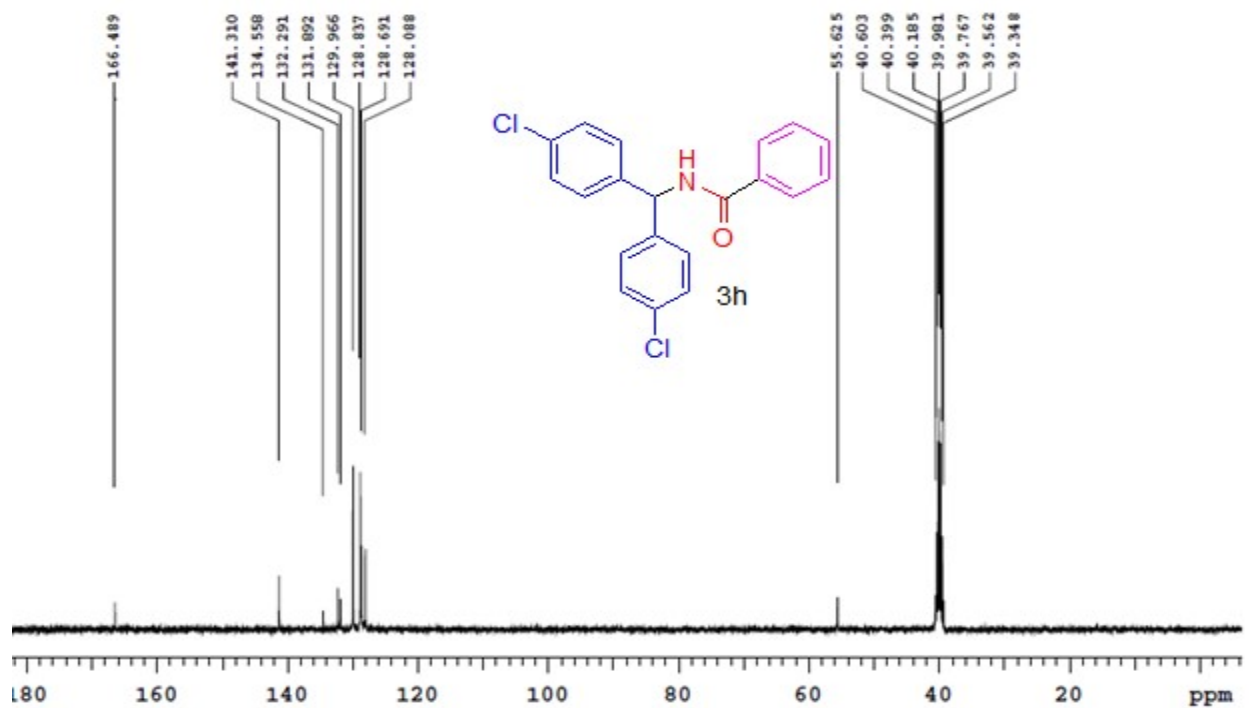

Figure 16.  $^{13}\text{C}$  NMR of *N*-(bis(4-chlorophenyl)methyl)benzamide

*N*-(bis(4-fluorophenyl)methyl)benzamide (3i):

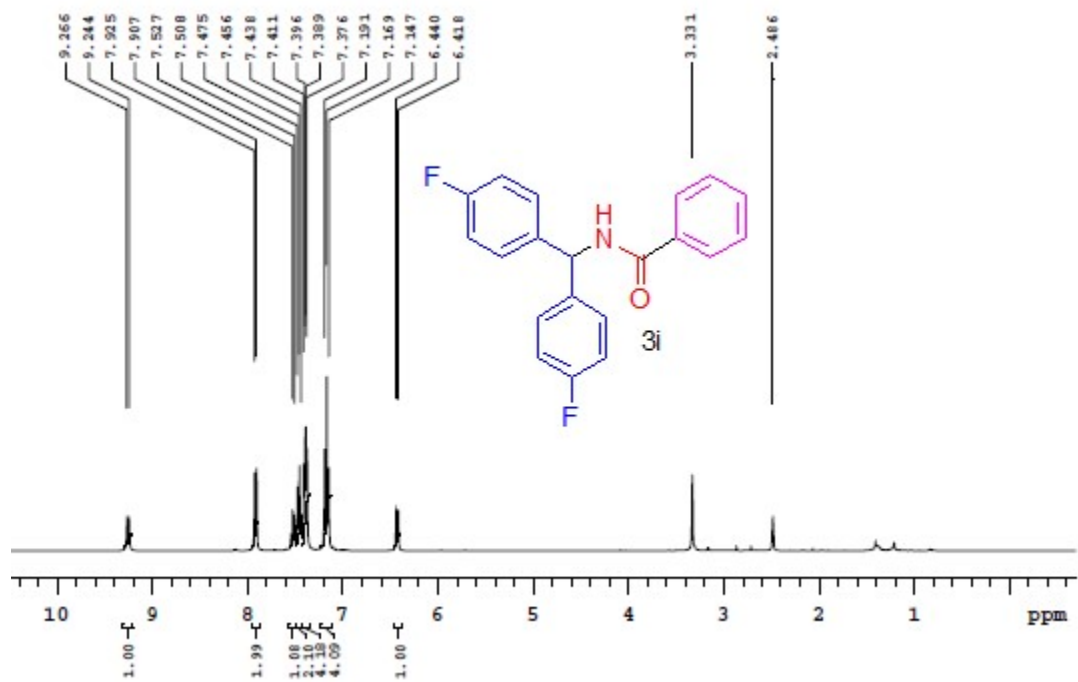

Figure 17.  $^1\text{H}$  NMR of *N*-(bis(4-fluorophenyl)methyl)benzamide

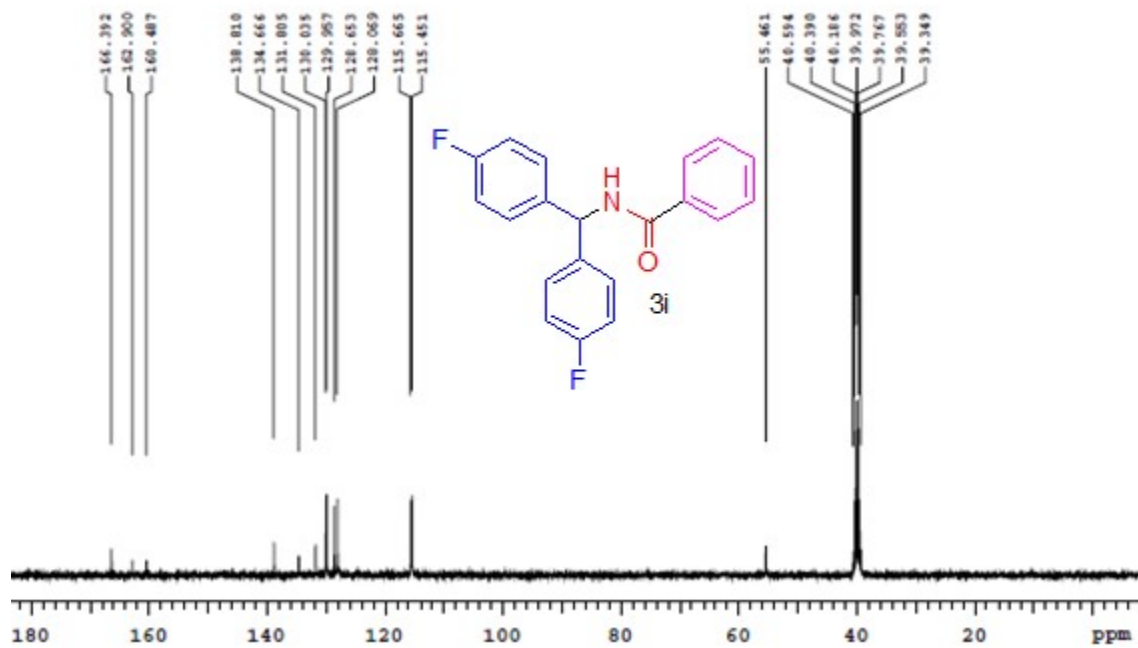

Figure 18. <sup>13</sup>C NMR of *N*-(bis(4-fluorophenyl)methyl)benzamide

*N*-(1-phenylethyl)benzamide (3j):

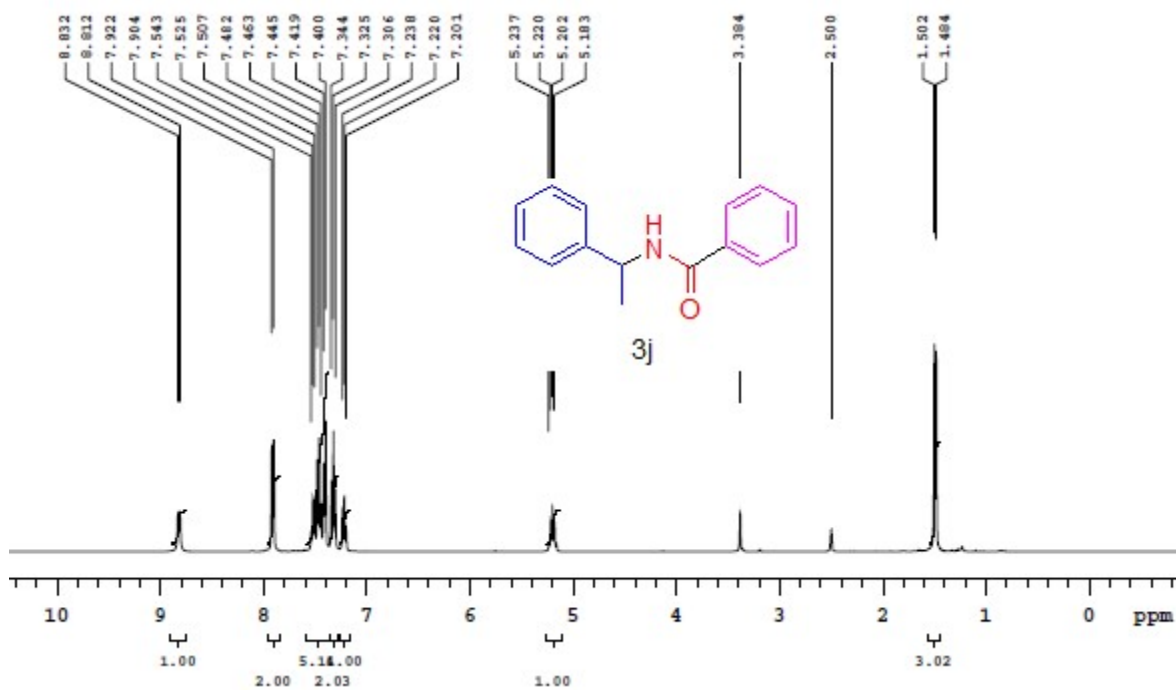

Figure 19. <sup>1</sup>H NMR of *N*-(1-phenylethyl)benzamide

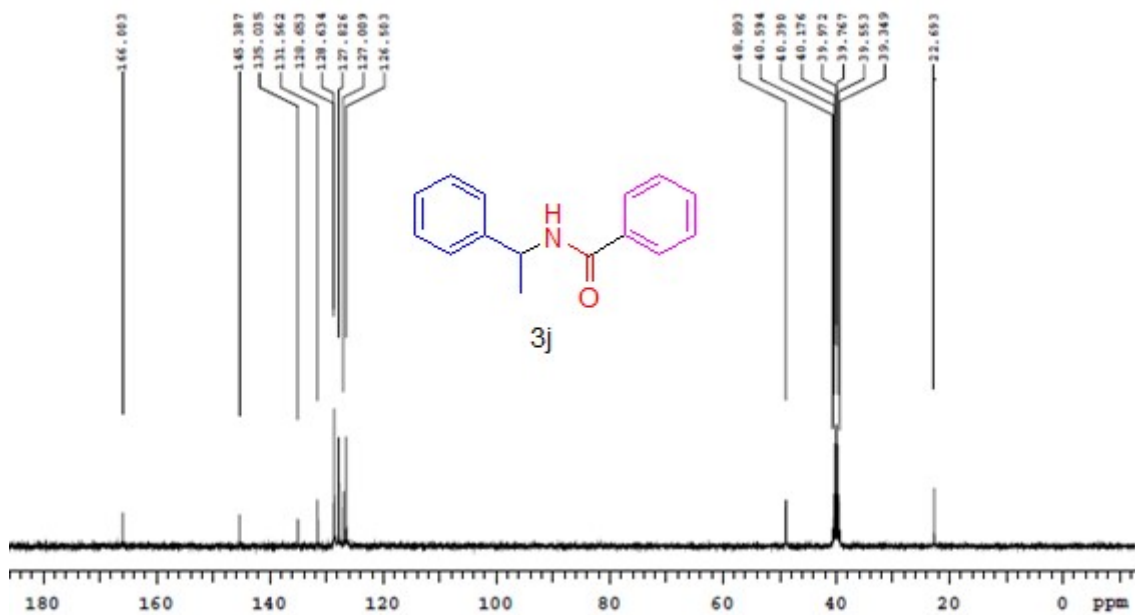

**Figure 20.**  $^{13}\text{C}$  NMR of *N*-(1-phenylethyl)benzamide

***N*-benzhydrylbenzenesulfonamide (3k):**

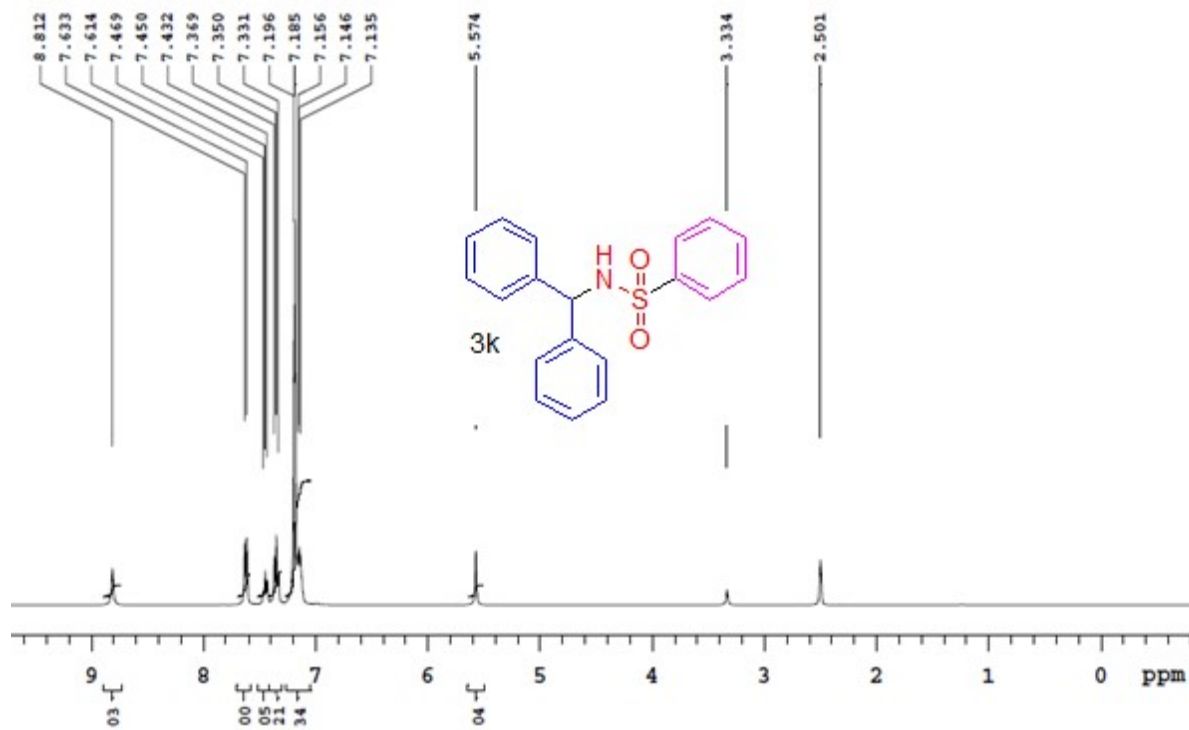

**Figure 21.**  $^1\text{H}$  NMR of *N*-benzhydrylbenzenesulfonamide

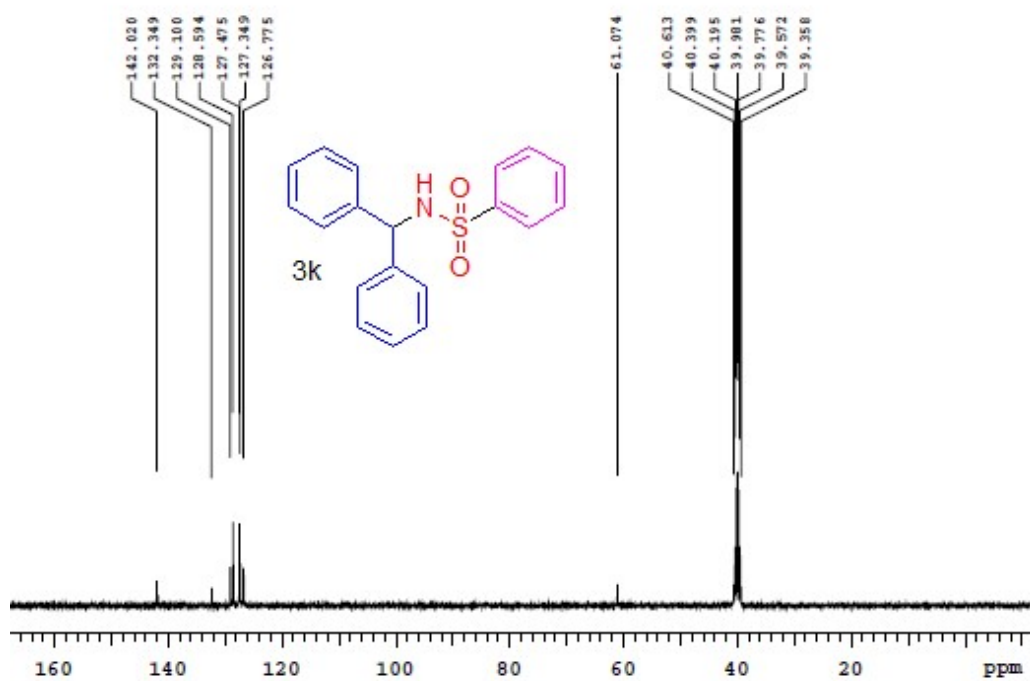

**Figure 22.**  $^{13}\text{C}$  NMR of *N*-benzhydrylbenzenesulfonamide

*N*-benzhydryl-4-chlorobenzenesulfonamide (3l):

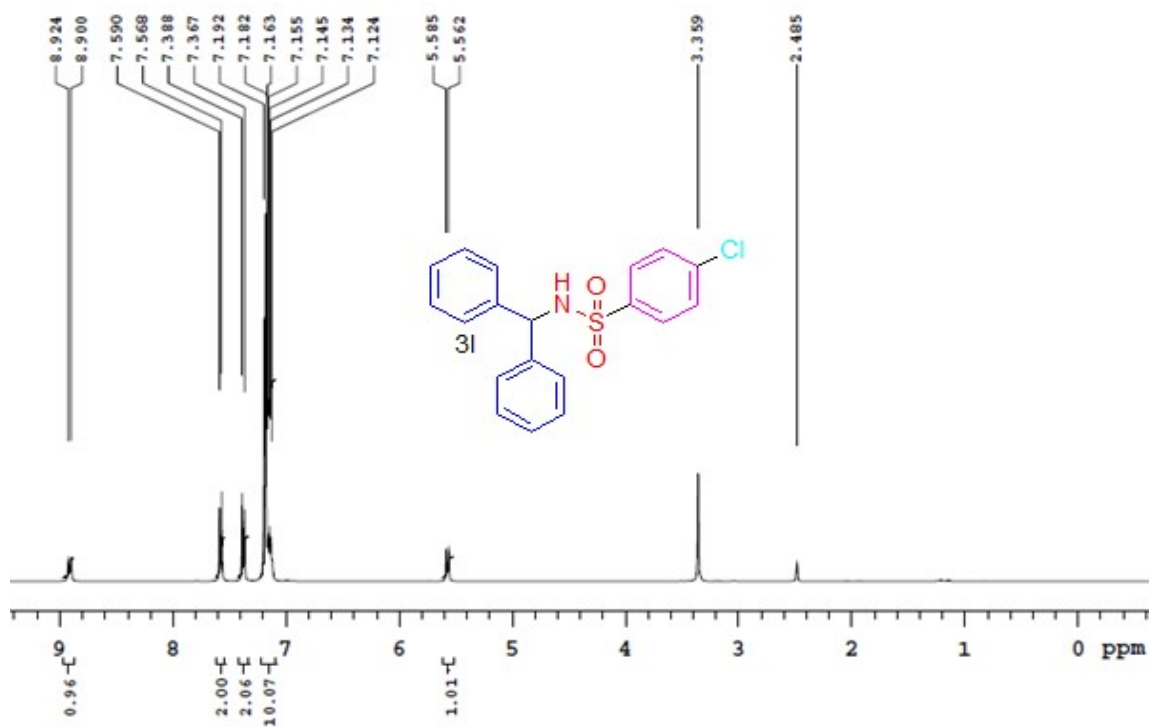

**Figure 23.**  $^1\text{H}$  NMR of *N*-benzhydryl-4-chlorobenzenesulfonamide

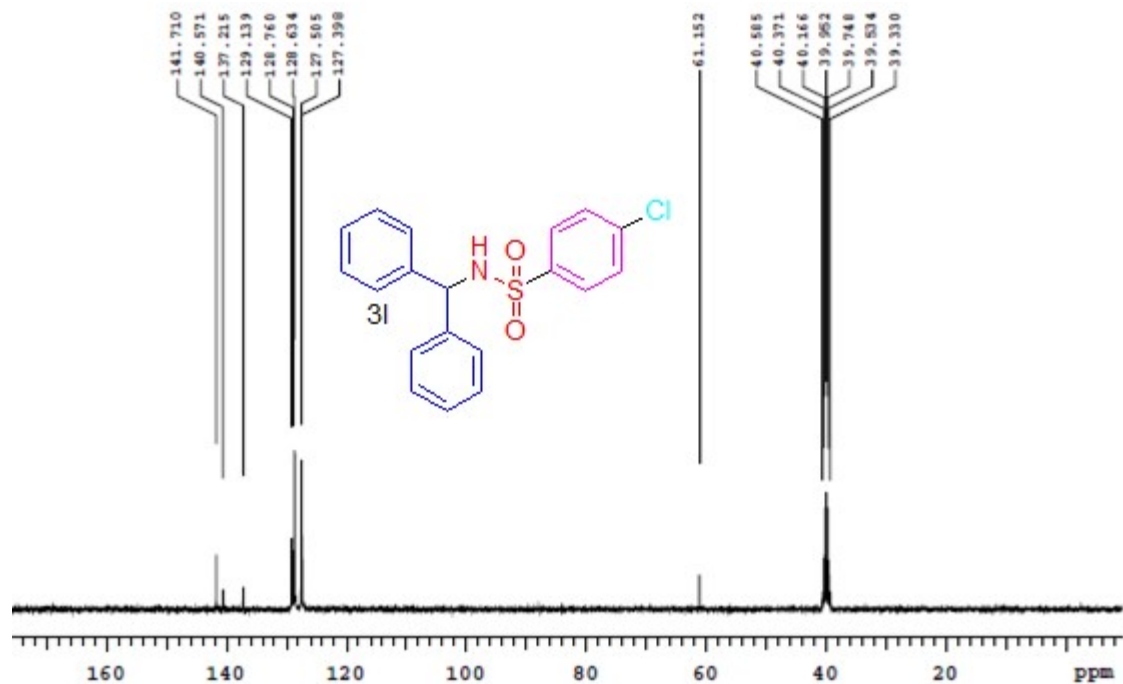

**Figure 24.**  $^{13}\text{C}$  NMR of *N*-benzhydryl-4-chlorobenzenesulfonamide

*N*-benzhydryl-4-methylbenzenesulfonamide (3m):

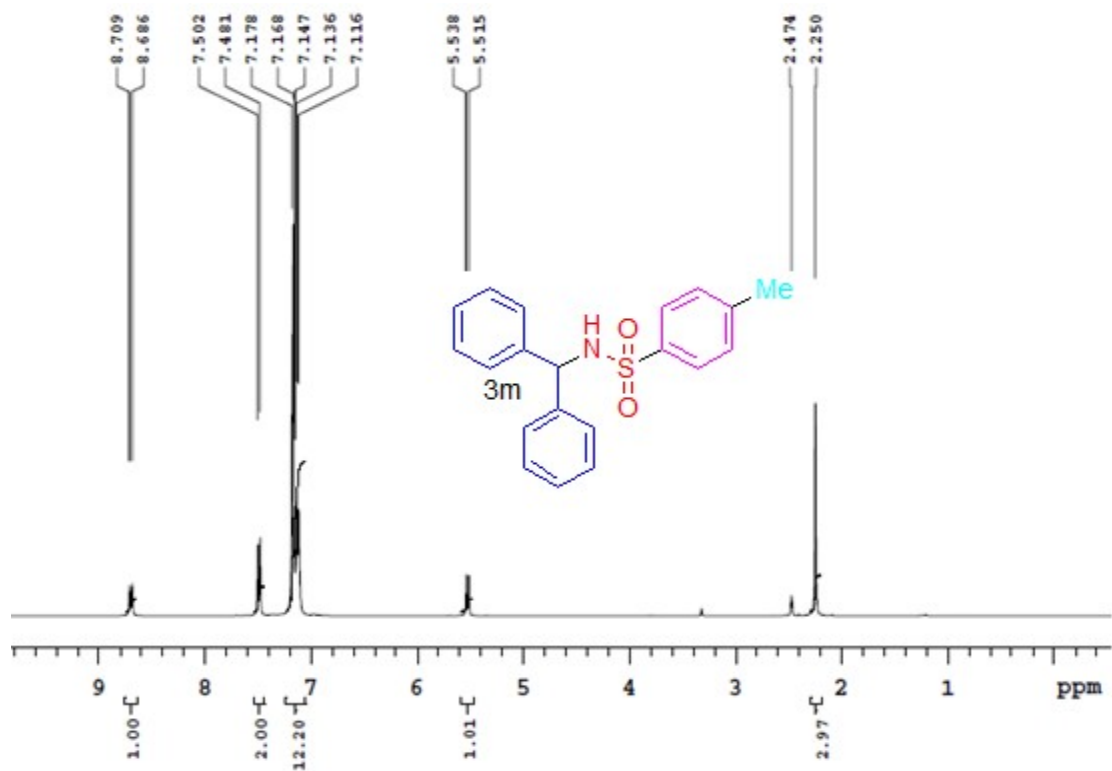

**Figure 25.**  $^1\text{H}$  NMR of *N*-benzhydryl-4-methylbenzenesulfonamide

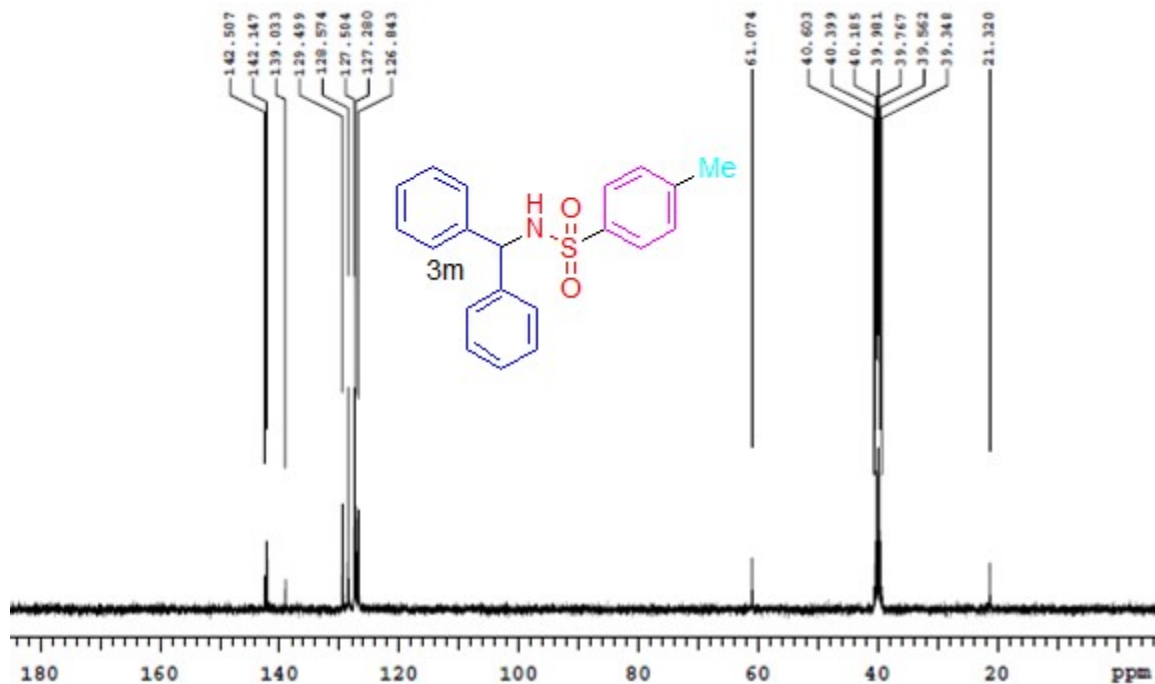

Figure 26.  $^{13}\text{C}$  NMR of *N*-benzhydryl-4-methylbenzenesulfonamide

*N*-benzhydrylmethanesulfonamide (3n):

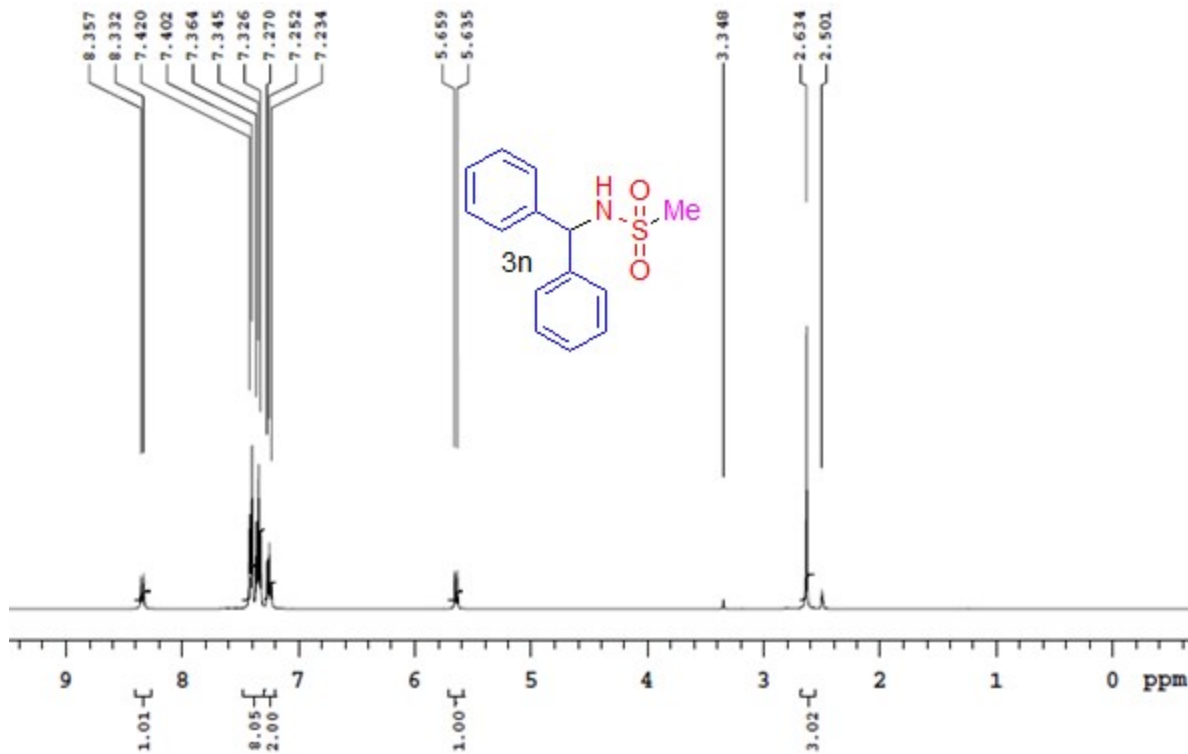

Figure 27.  $^1\text{H}$  NMR of *N*-benzhydrylmethanesulfonamide

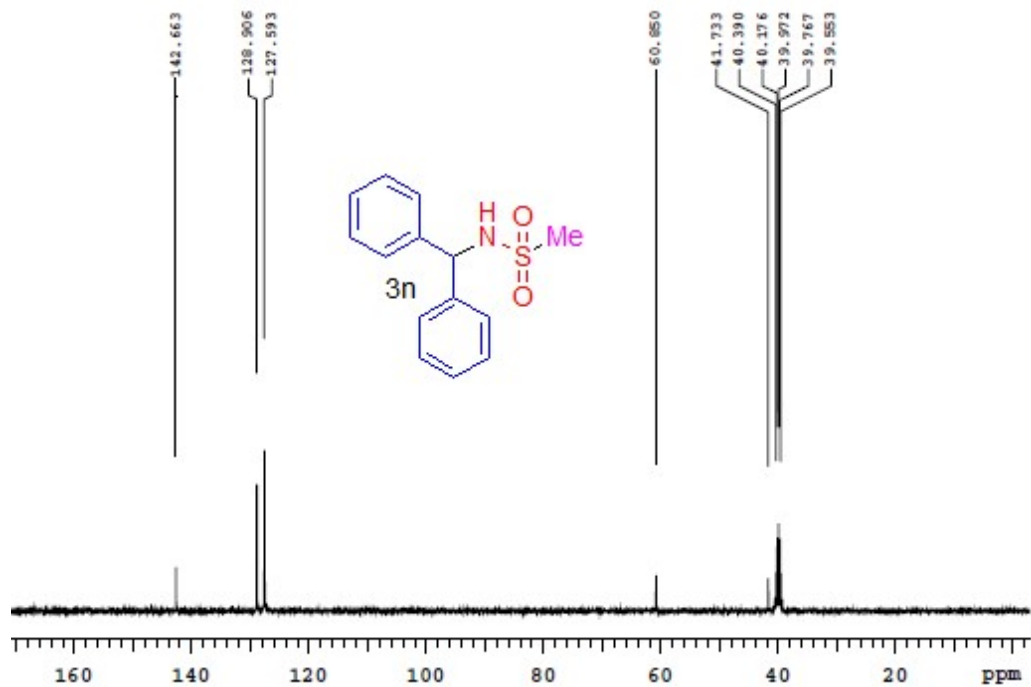

Figure 28.  $^{13}\text{C}$  NMR of *N*-benzhydrylmethanesulfonamide

*N*-(bis(4-chlorophenyl)methyl)methanesulfonamide (3o):

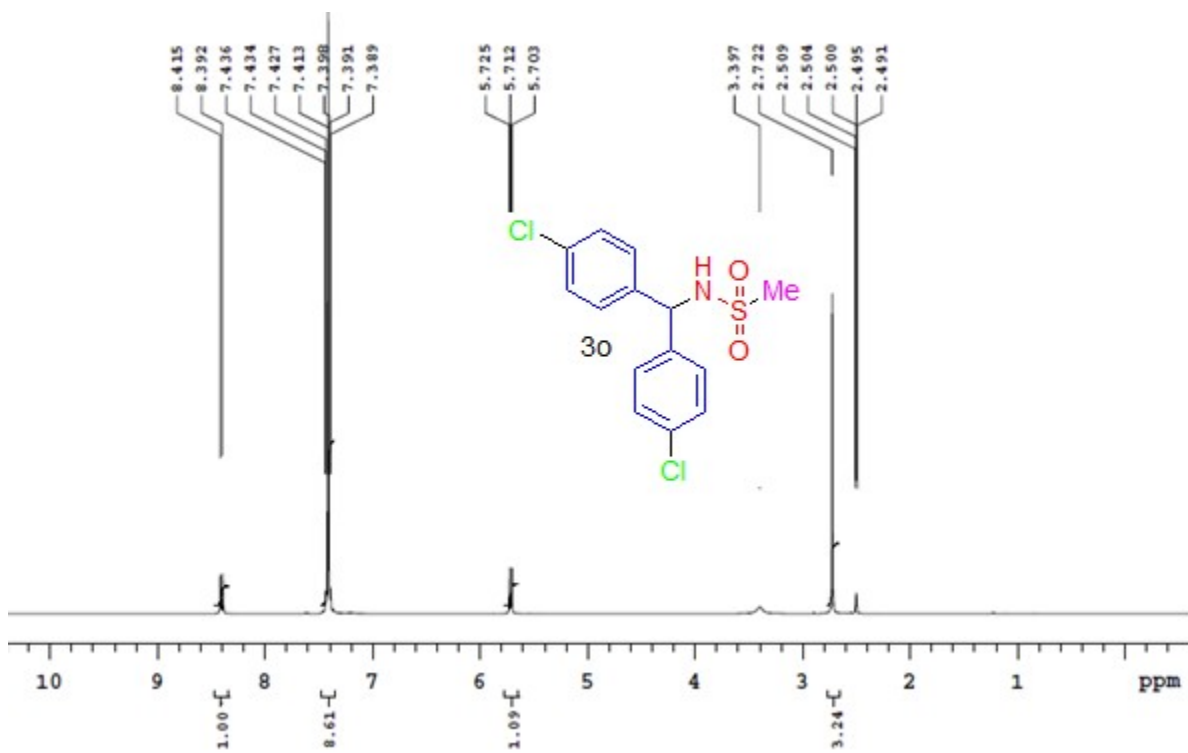

Figure 29.  $^1\text{H}$  NMR of *N*-(bis(4-chlorophenyl)methyl)methanesulfonamide



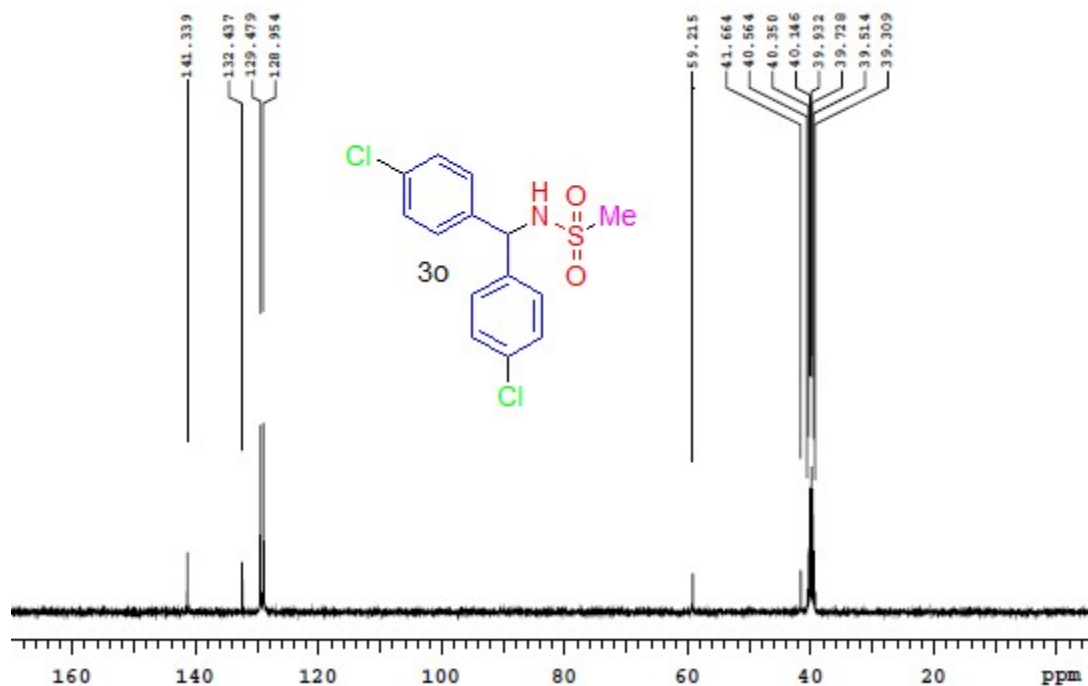

*N*-(bis(4-fluorophenyl)methyl)methanesulfonamide (3p):

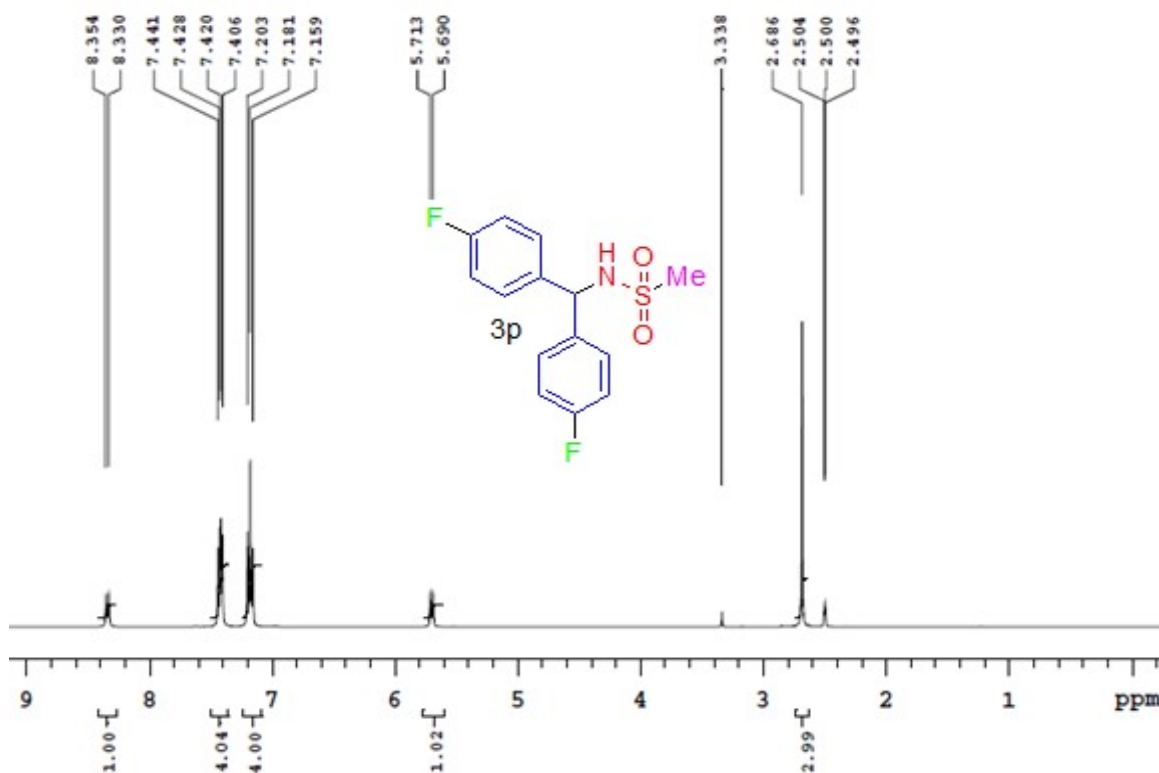

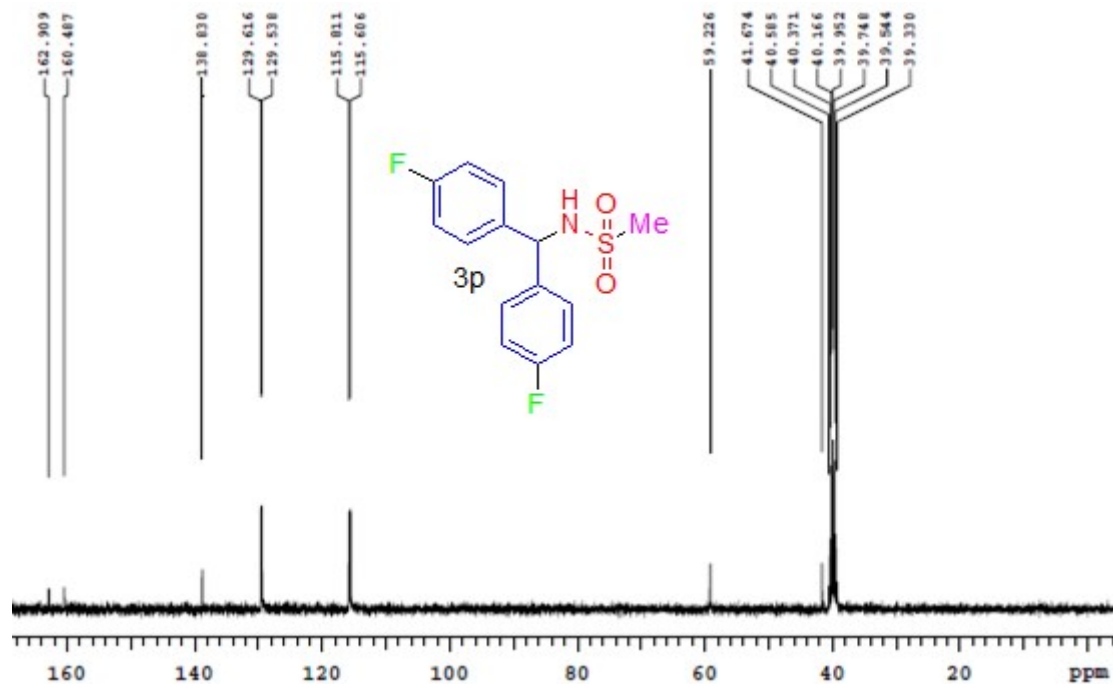

*N*-(bis(4-chlorophenyl)methyl)benzenesulfonamide (**3q**):

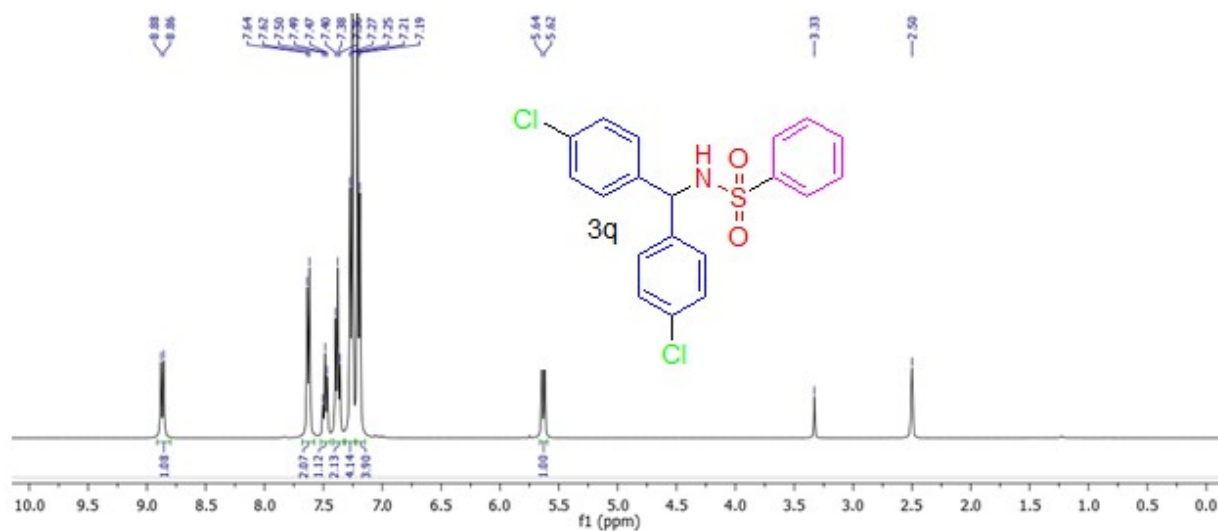

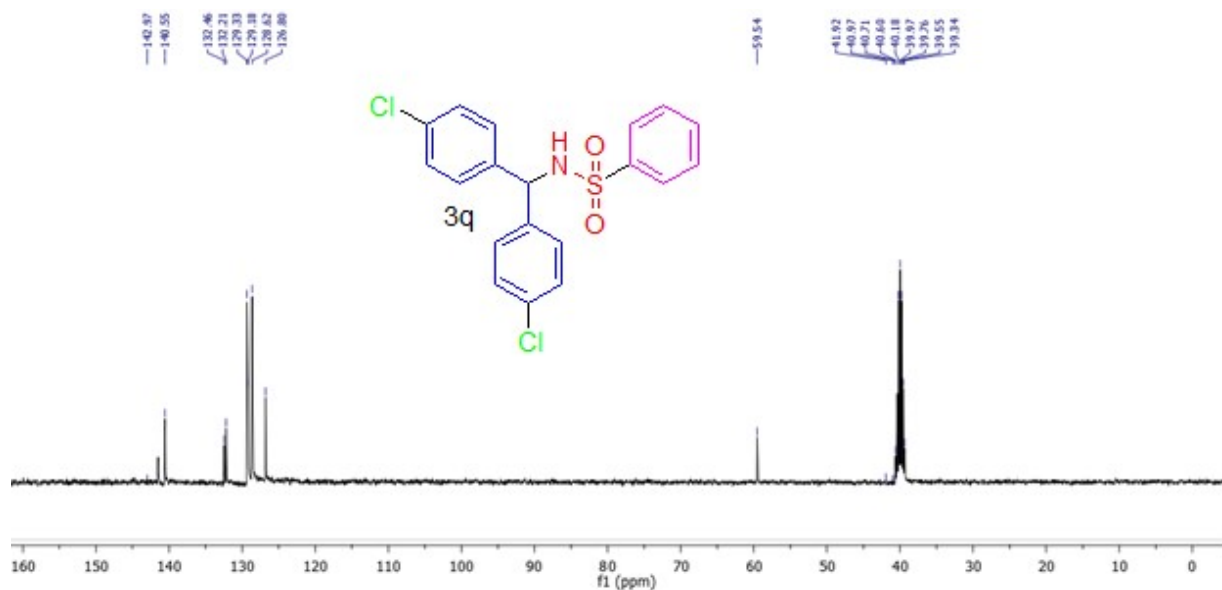

**Figure 34.** <sup>13</sup>C NMR of *N*-(bis(4-chlorophenyl)methyl)benzenesulfonamide

***N*-(bis(4-fluorophenyl)methyl)benzenesulfonamide (3r):**

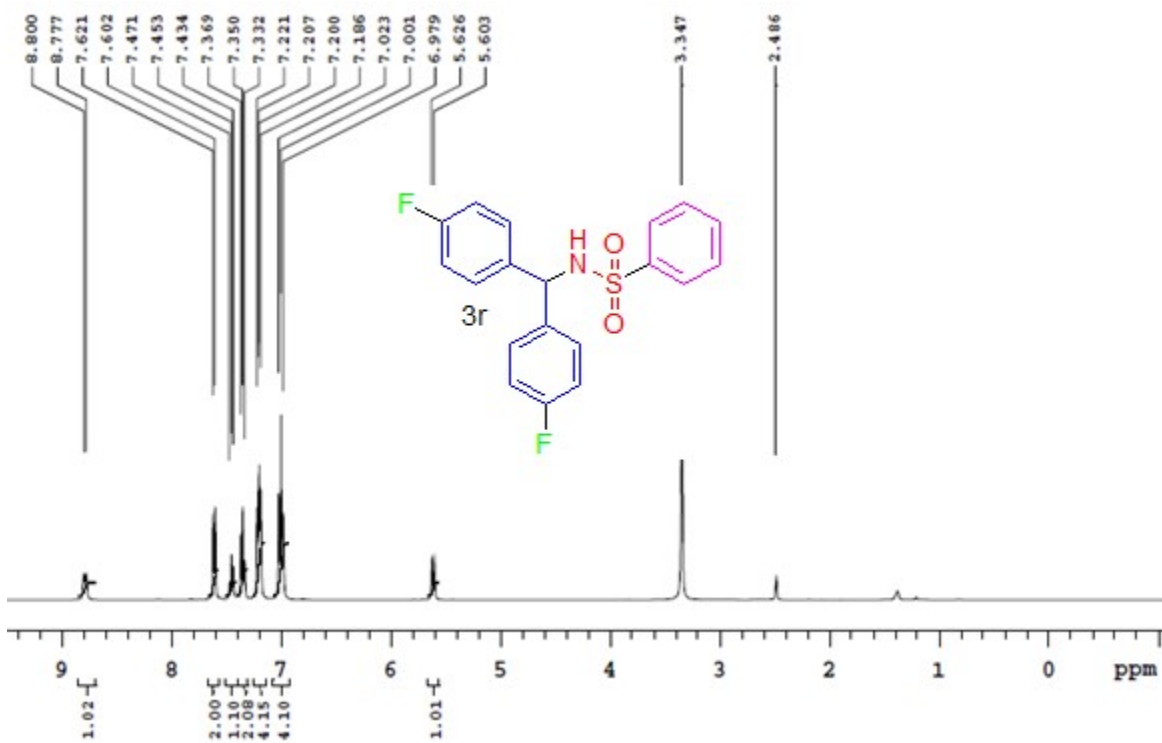

**Figure 35.** <sup>1</sup>H NMR of *N*-(bis(4-fluorophenyl)methyl)benzenesulfonamide

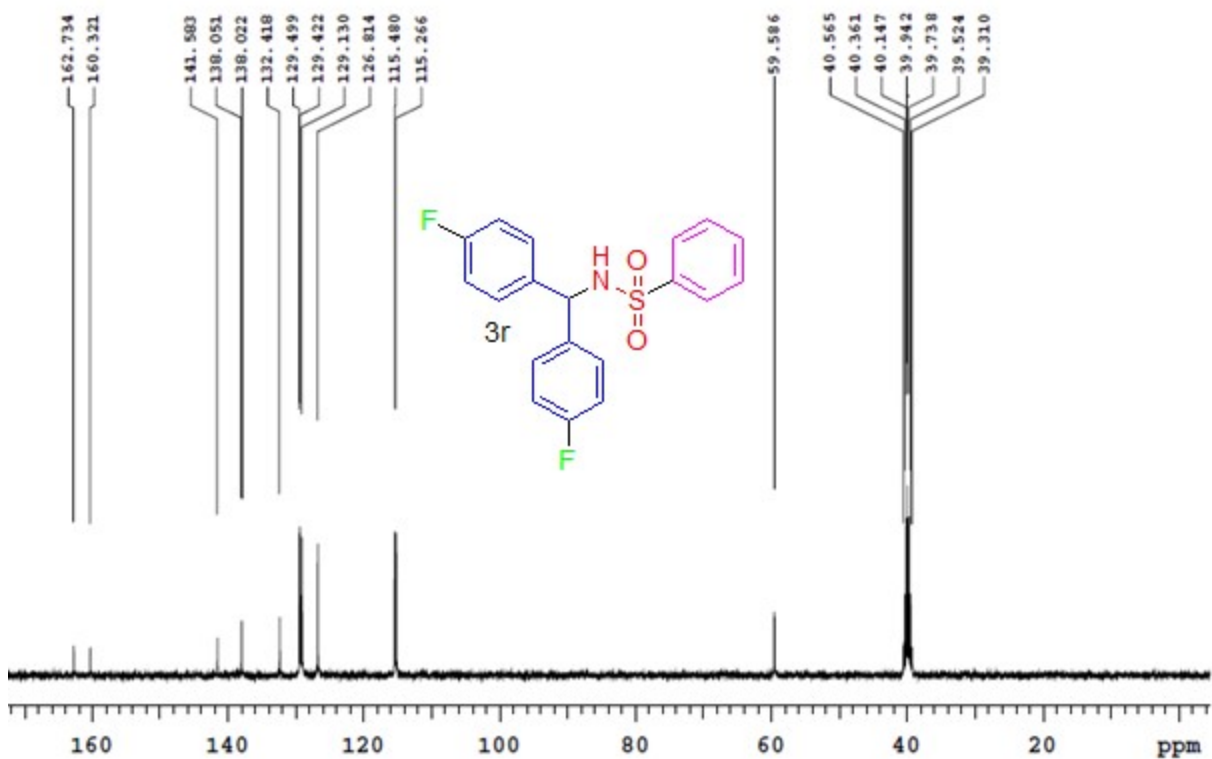

**Figure 36.**  $^{13}\text{C}$  NMR of *N*-(bis(4-fluorophenyl)methyl)benzenesulfonamide

***N*-(1-phenylethyl)benzenesulfonamide (3s):**

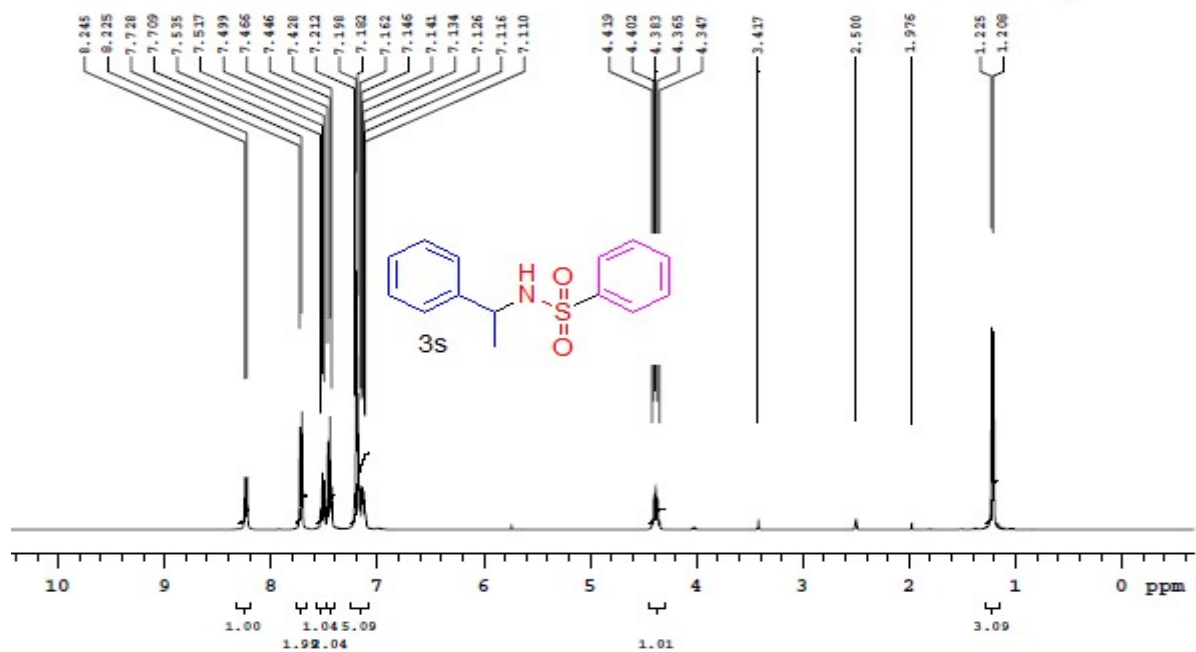

**Figure 37.**  $^1\text{H}$  NMR of *N*-(1-phenylethyl)benzenesulfonamide

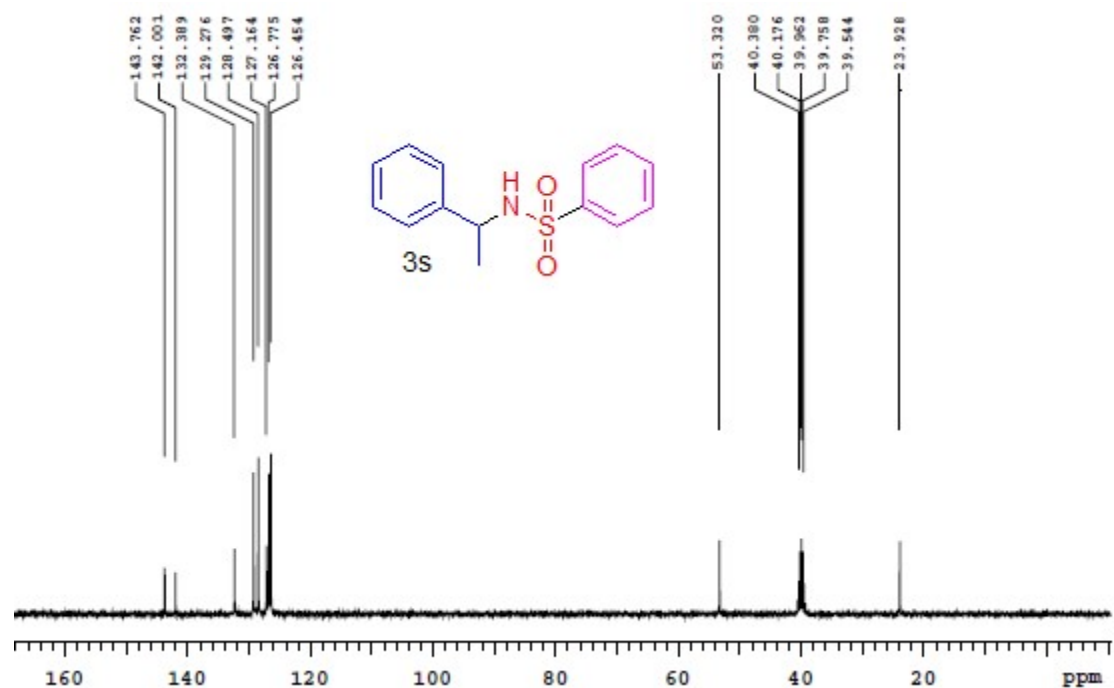

*N*-(1-phenylethyl)methanesulfonamide (**3t**):

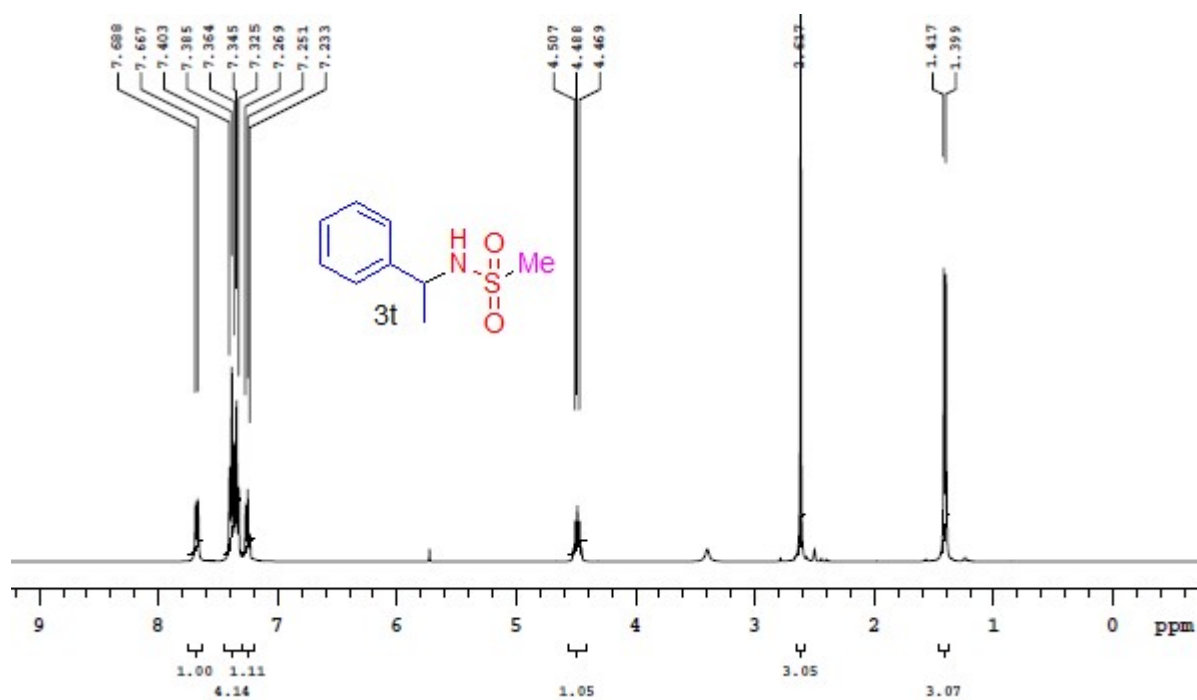

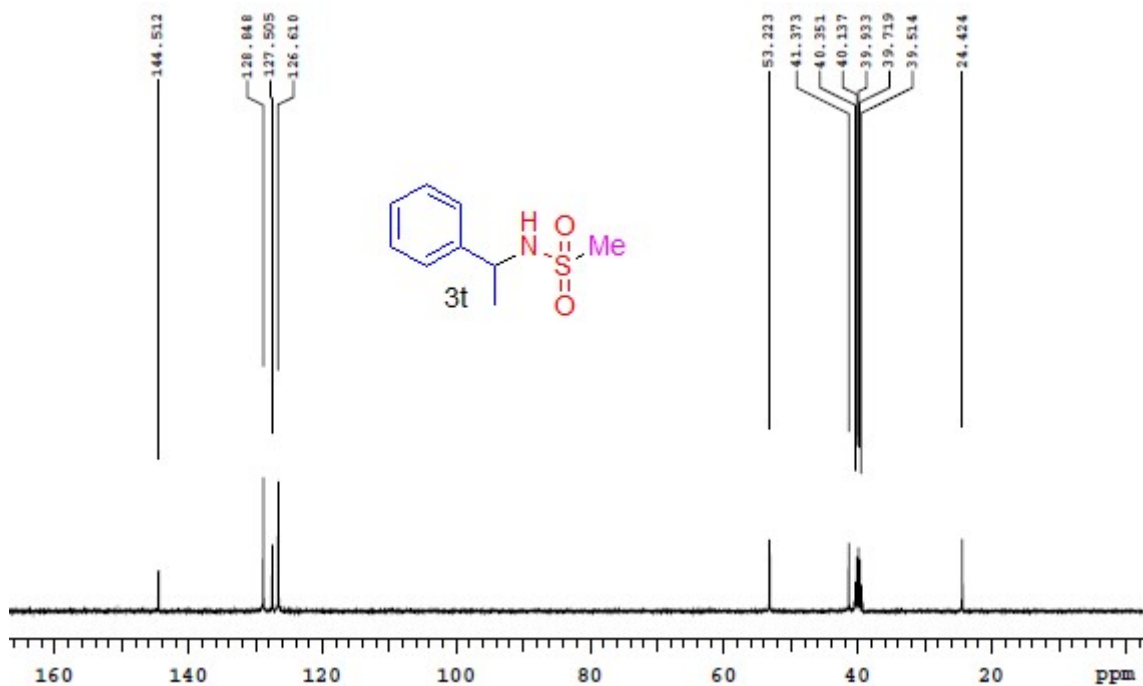

Figure 40. <sup>13</sup>C NMR of *N*-(1-phenylethyl)methanesulfonamide

**Methyl benzhydrylcarbamate (3u):**

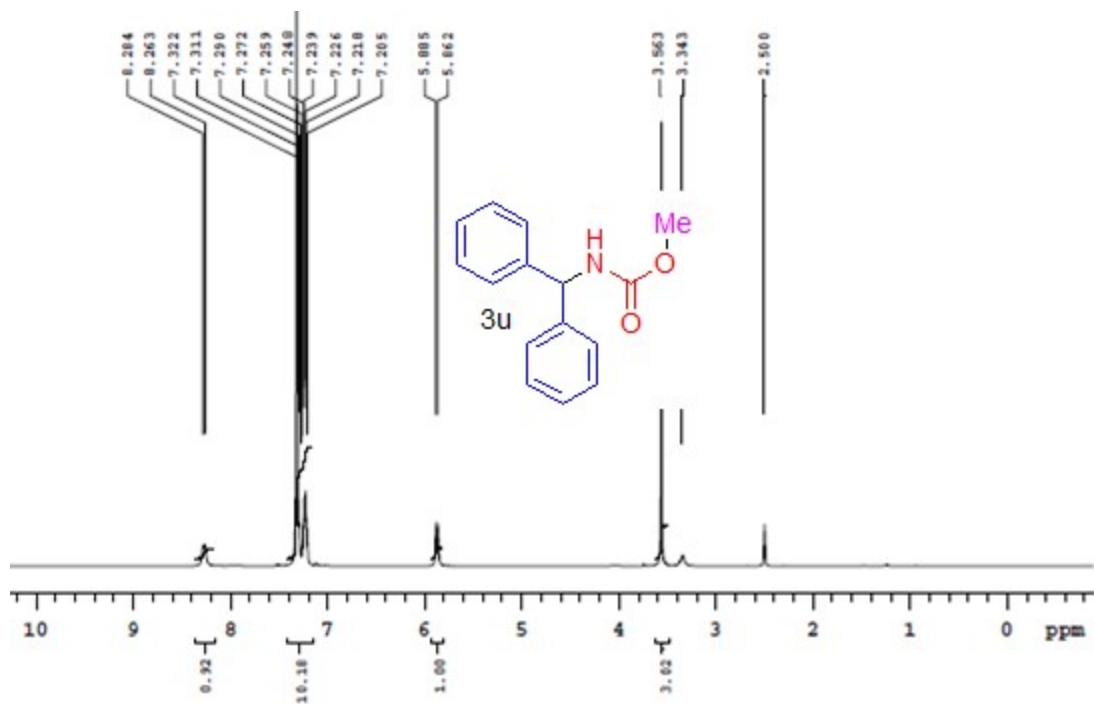

Figure 41. <sup>1</sup>H NMR of Methyl benzhydrylcarbamate

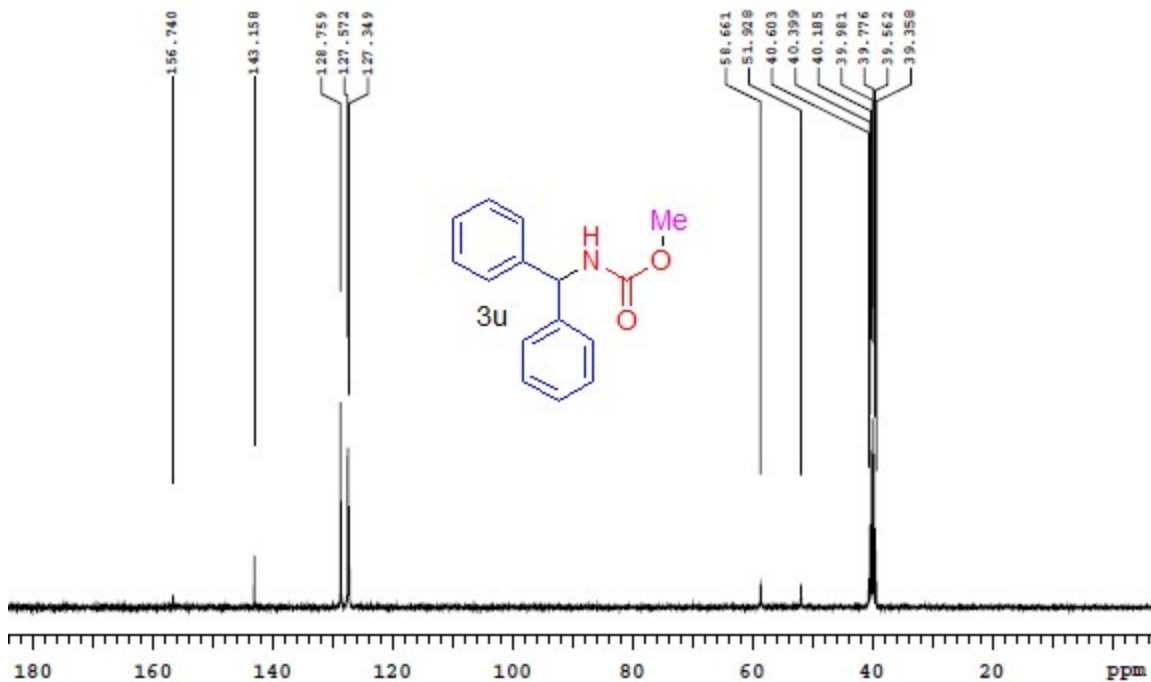

Figure 42. <sup>13</sup>C NMR of Methyl benzhydrylcarbamate

Methyl bis(4-chlorophenyl)methylcarbamate (3v):

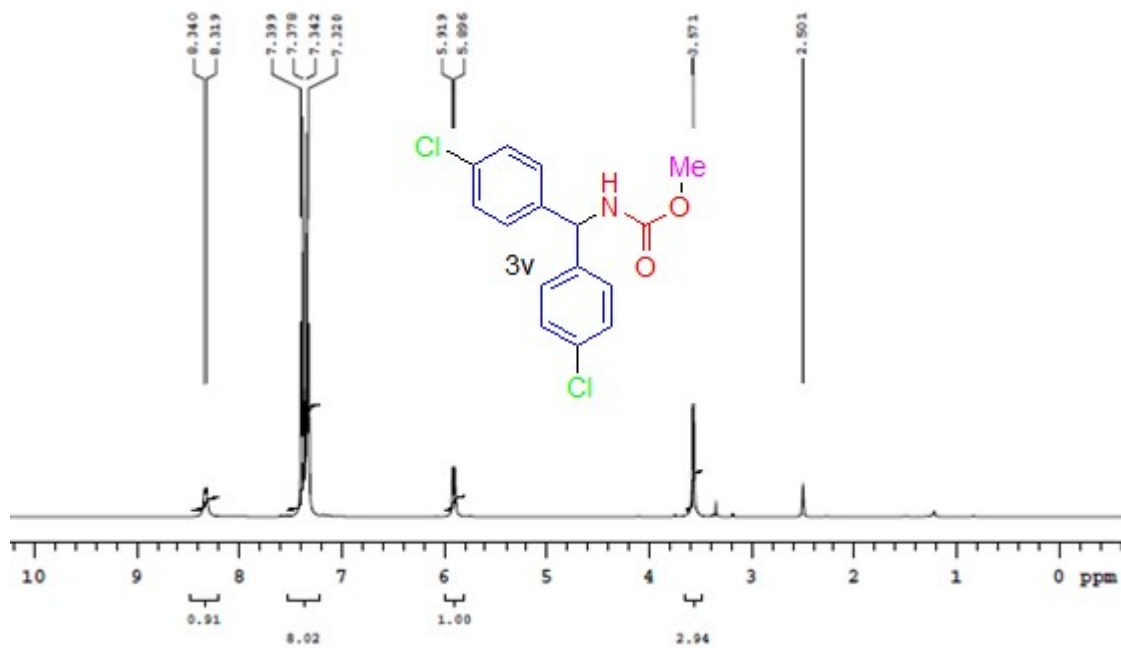

Figure 43. <sup>1</sup>H NMR of Methyl bis(4-chlorophenyl)methylcarbamate

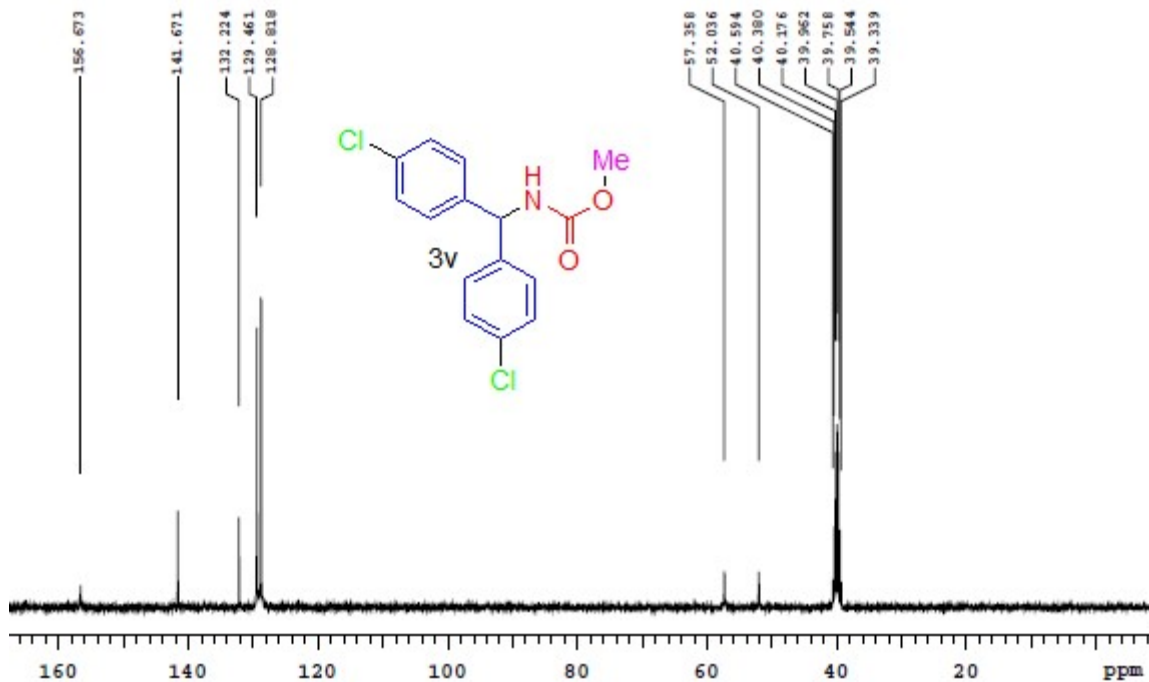

**Methyl bis(4-fluorophenyl)methylcarbamate (3w):**

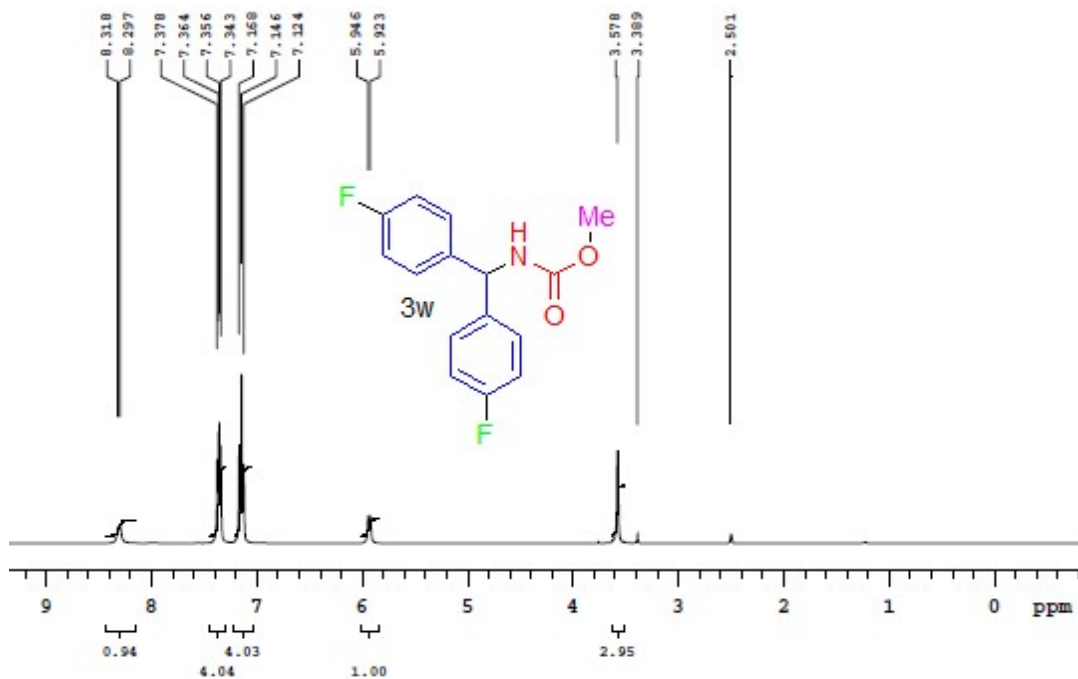



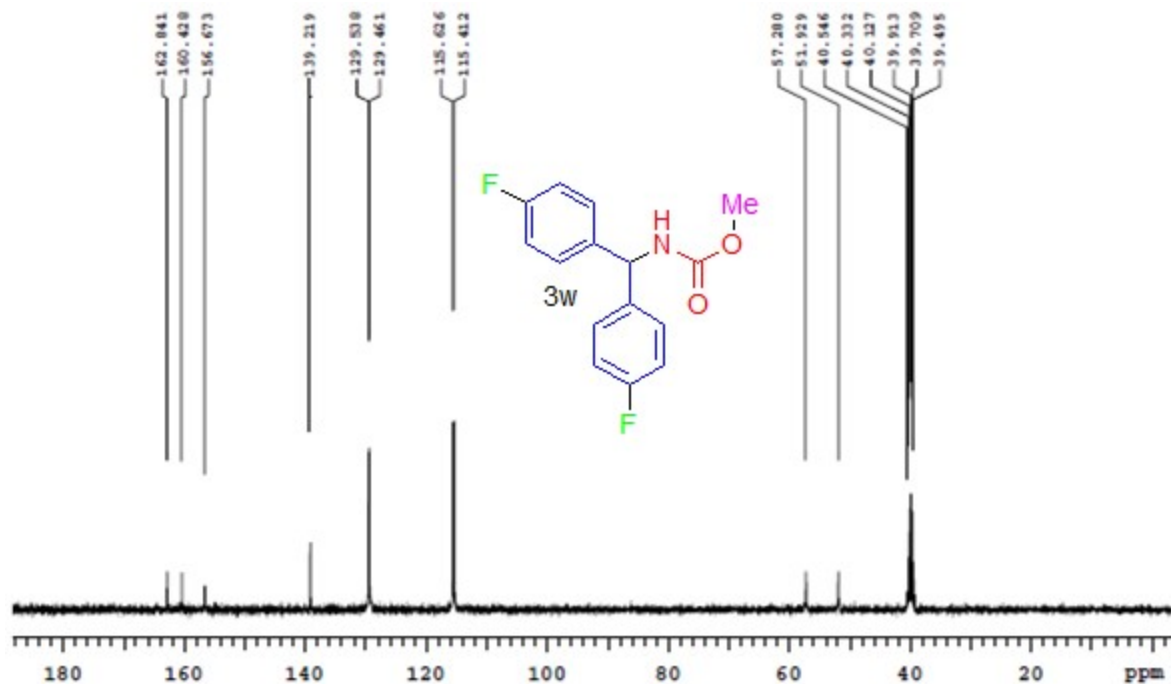

**Methyl 1-phenylethylcarbamate (3x):**

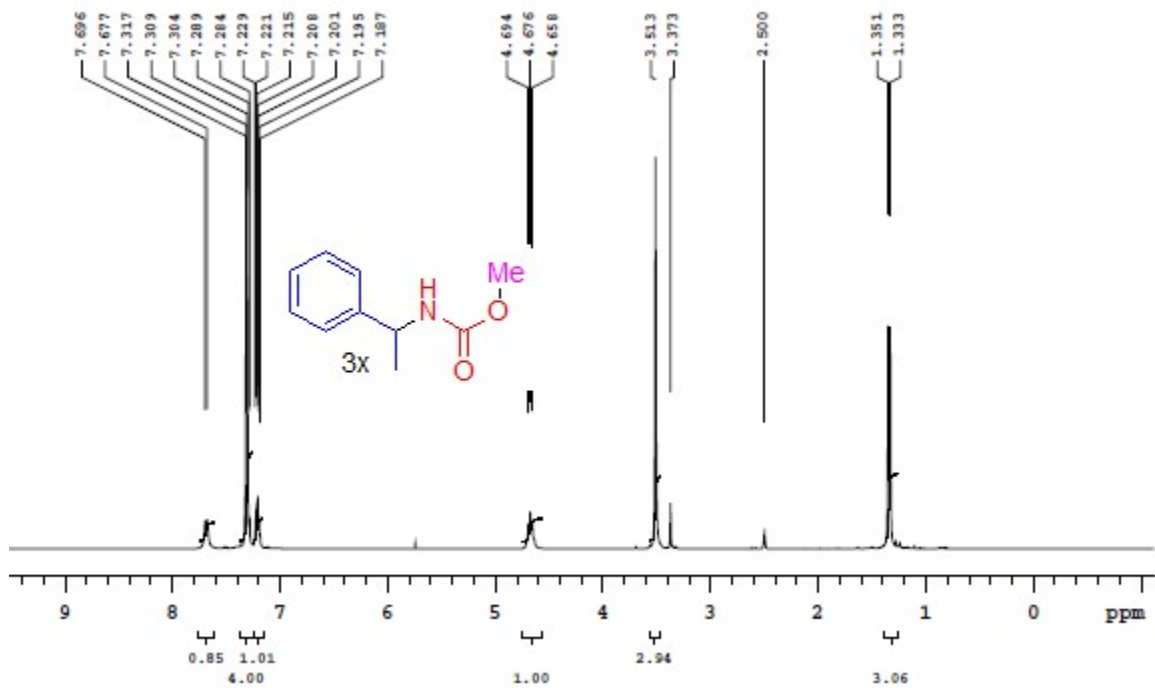

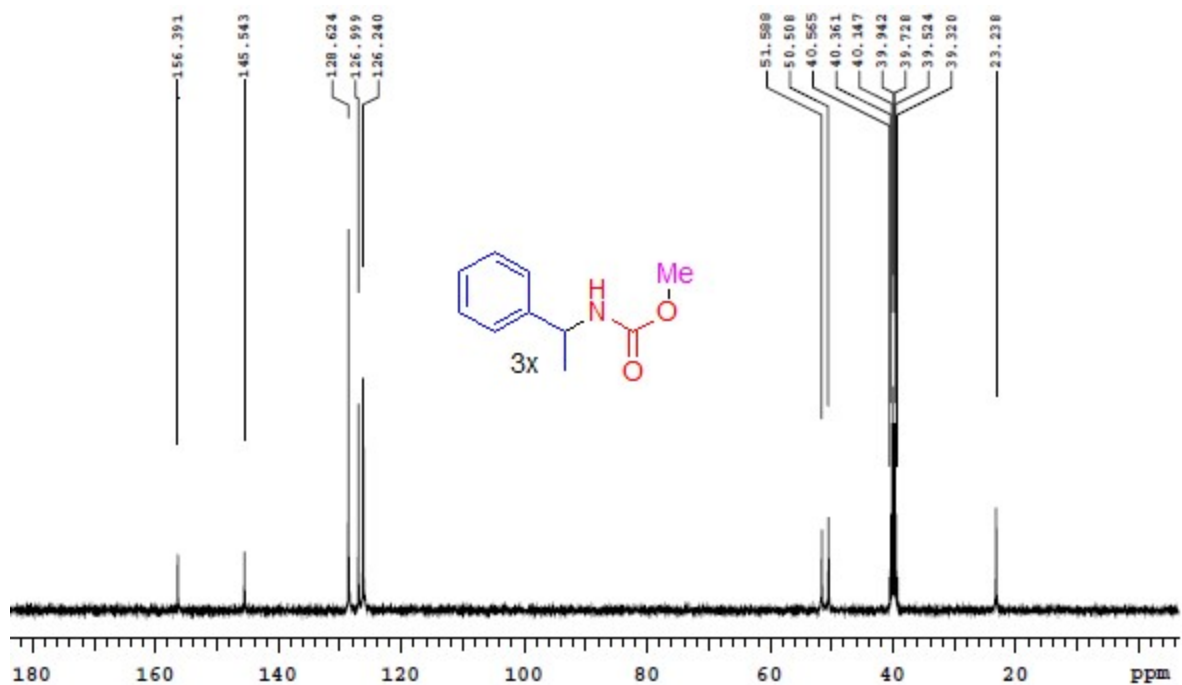

Figure 48.  $^{13}\text{C}$  NMR of Methyl 1-phenylethylcarbamate

Benzyl benzhydrylcarbamate (3y):

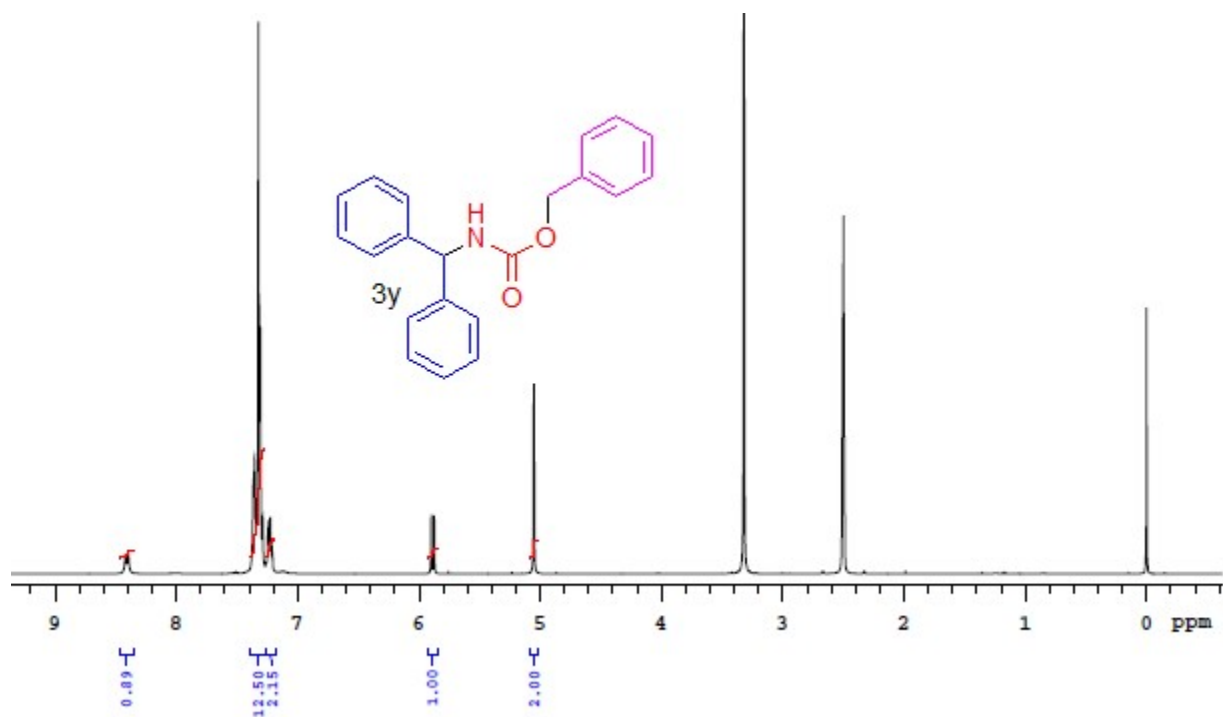

Figure 49.  $^1\text{H}$  NMR of Benzyl benzhydrylcarbamate

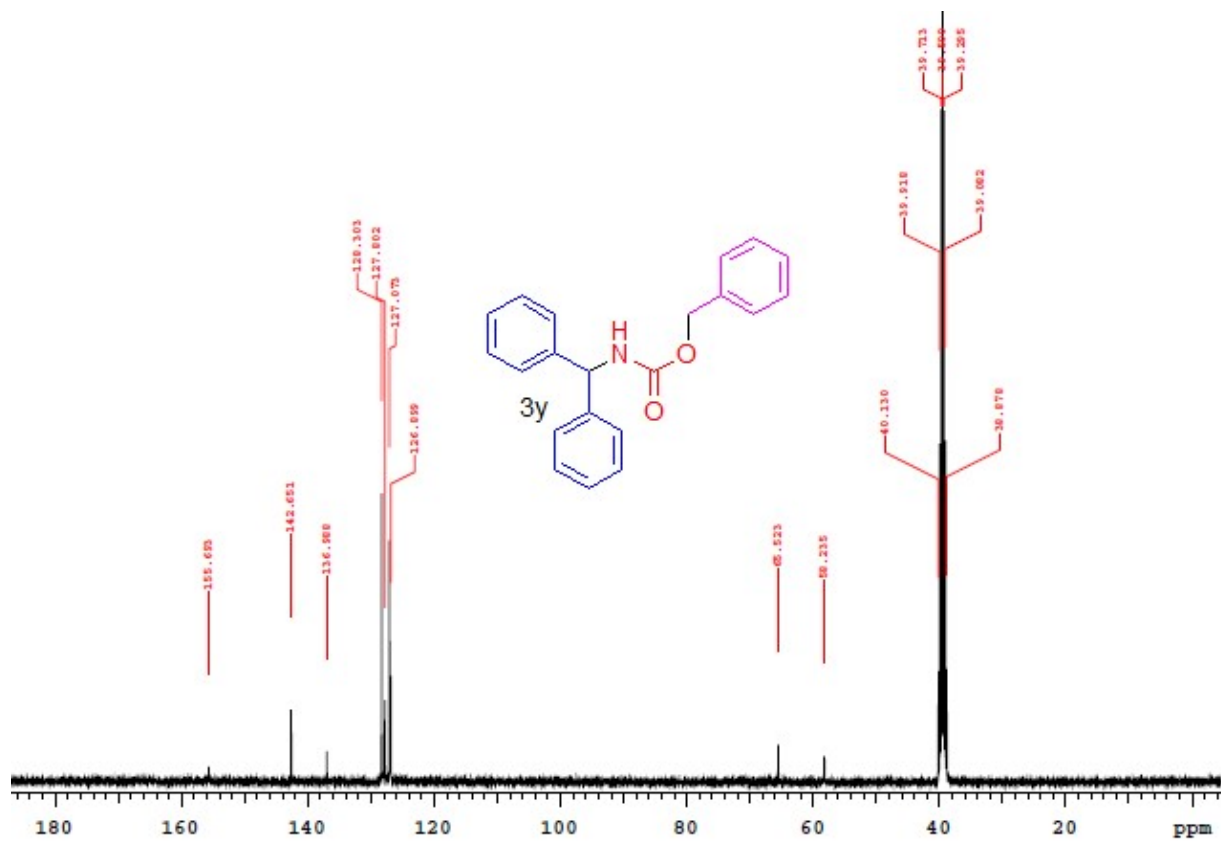

**Figure 50.**  $^{13}\text{C}$  NMR of Benzyl benzhydrylcarbamate

***N*-tritylbenzamide (3z):**

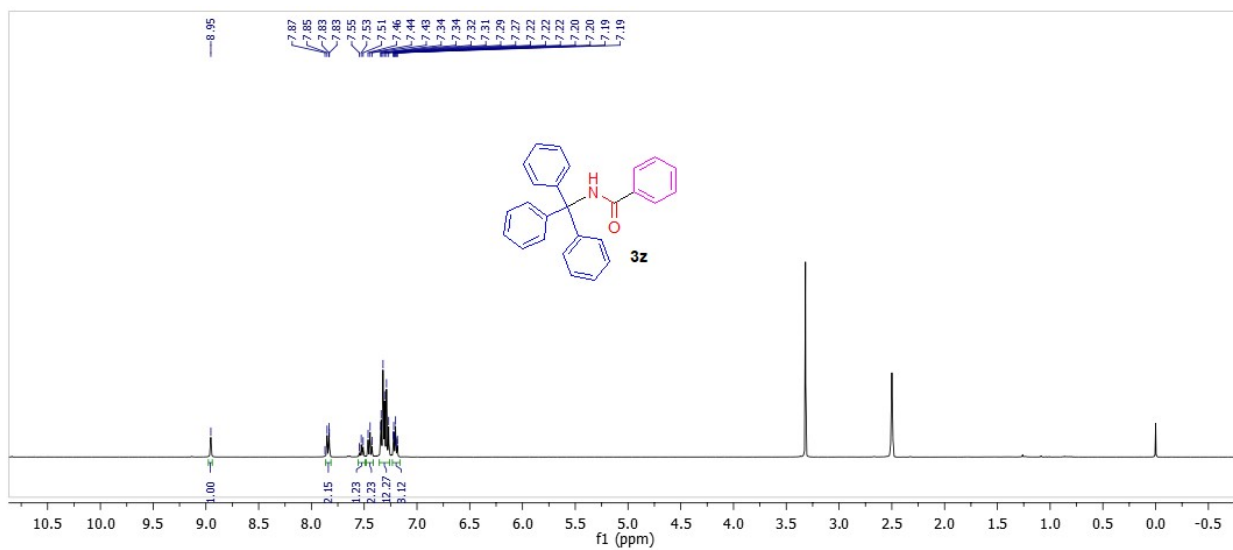

**Figure 51.**  $^1\text{H}$  NMR of *N*-tritylbenzamide

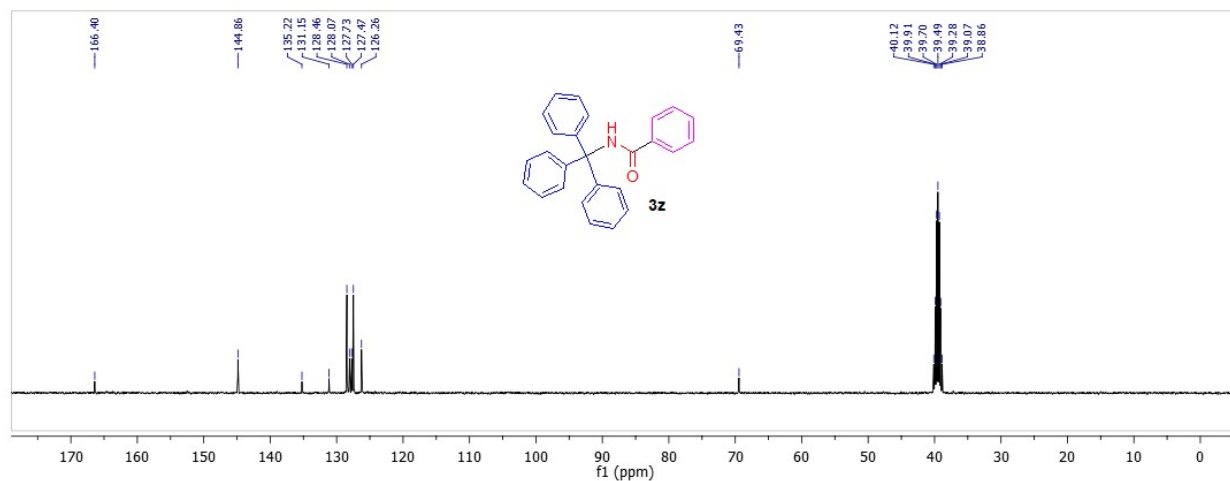

Figure 52. <sup>13</sup>C NMR of *N*-tritylbenzamide

(Benzhydryloxy)diphenylmethane **4a**:

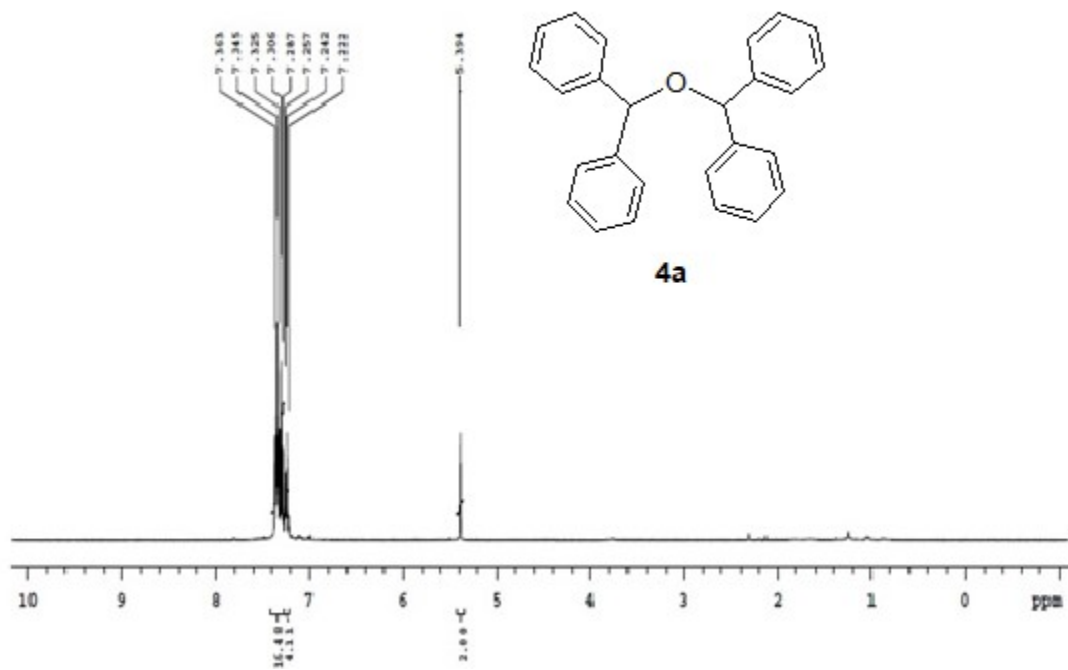

Figure 53. <sup>1</sup>H NMR of (benzhydryloxy)diphenylmethane

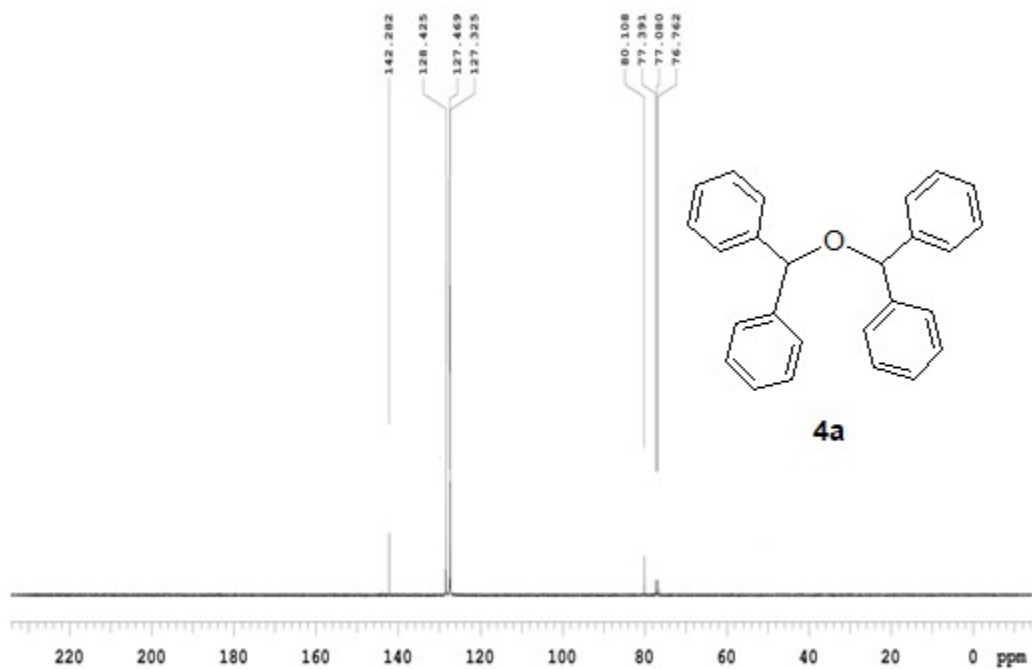

Figure 54.  $^{13}\text{C}$  NMR of (benzhydryloxy)diphenylmethane

Control experiments:

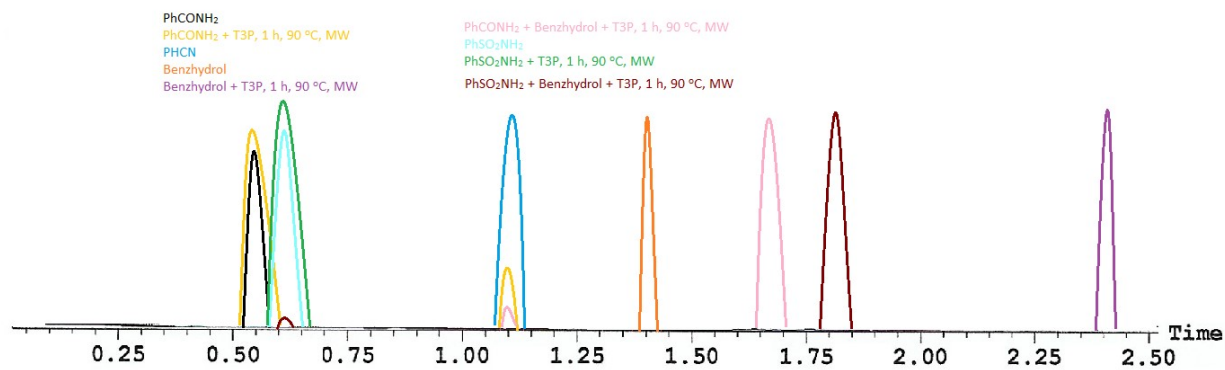

Figure 55. Control experiments
